# Supplementary material for: Molecular subtypes based on DNA sensors predict prognosis and tumor immunophenotype in hepatocellular carcinoma
Source: publisher site journal article supplement (doi:10.18632/aging.204870), 2023-07-14
Supplement: Supplementary file [file aging-v15i14-204870-supplementary-material-SD1.pdf]

SUPPLEMENTARY FIGURES

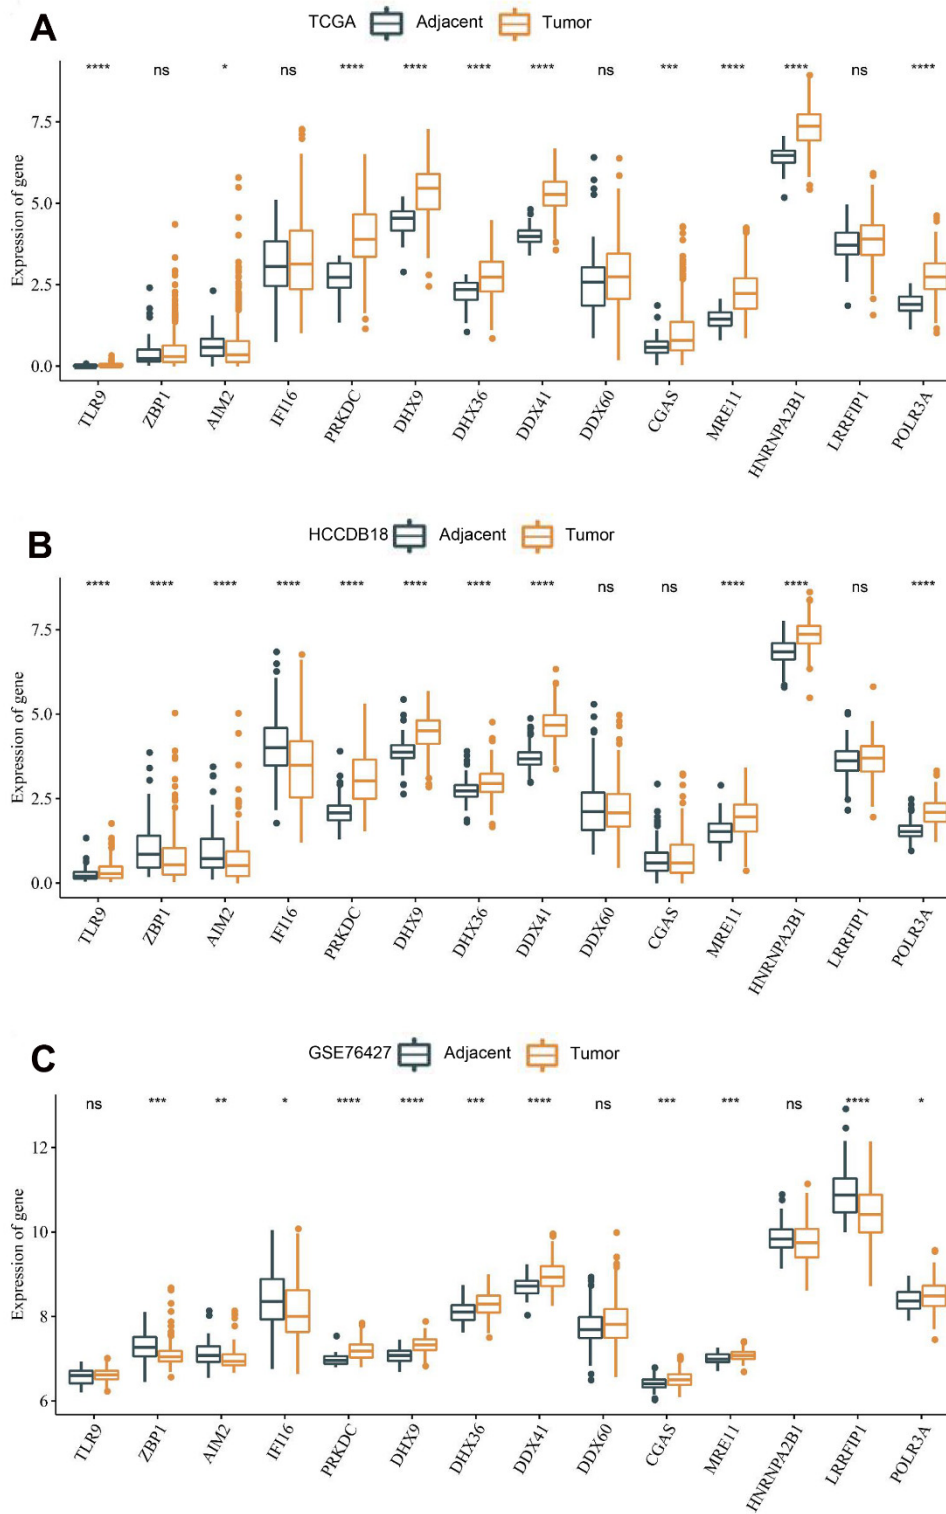

Supplementary Figure 1. Analysis of mRNA differences in DNA sensor genes. (A) TCGA dataset. (B) HCCDB18 dataset. (C) GSE76427 dataset.



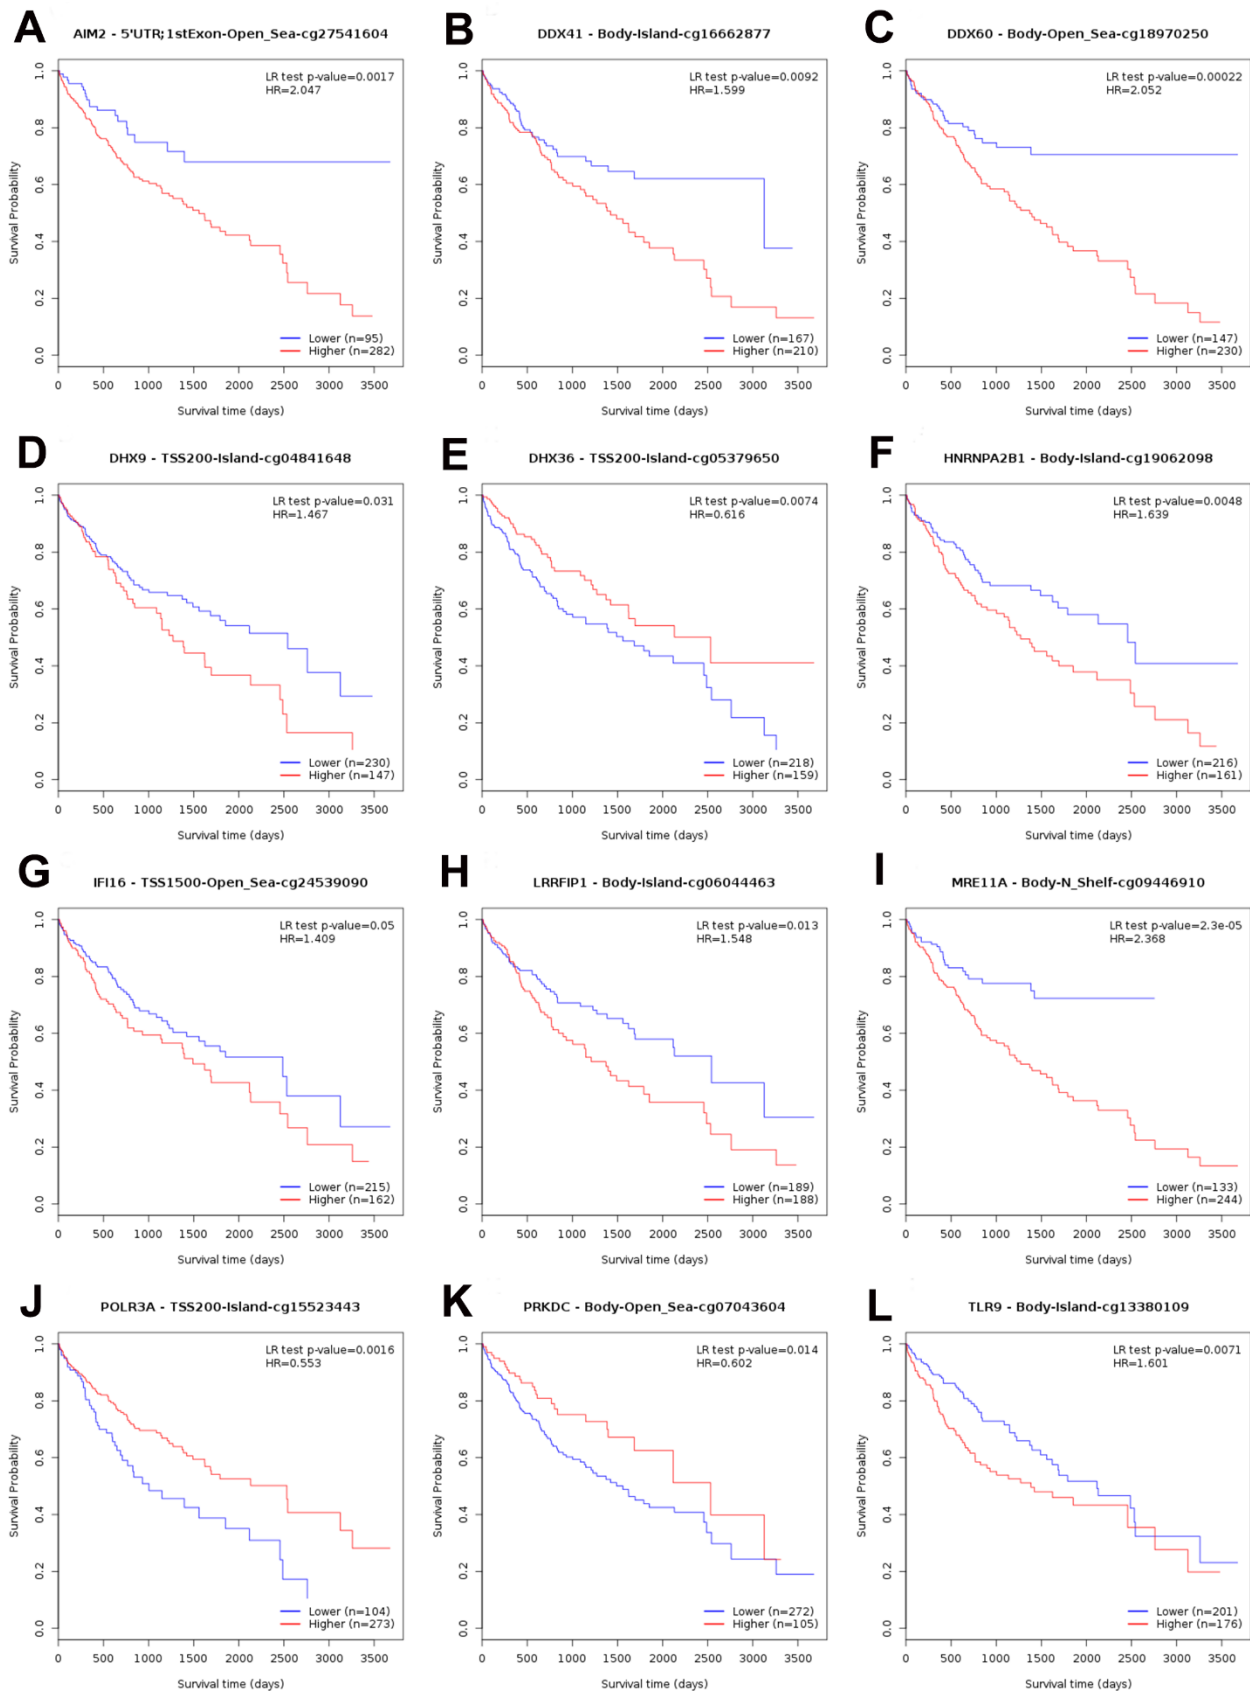

**Supplementary Figure 3. Survival analysis of cg sites. (A) AIM2. (B) DDX41. (C) DDX60. (D) DHX9. (E) DHX36. (F) HNRNPA2B1. (G) IFI16. (H) LRRFIP1. (I) MRE11. (J) POLR3. (K) PRKDC. (L) TLR9.**

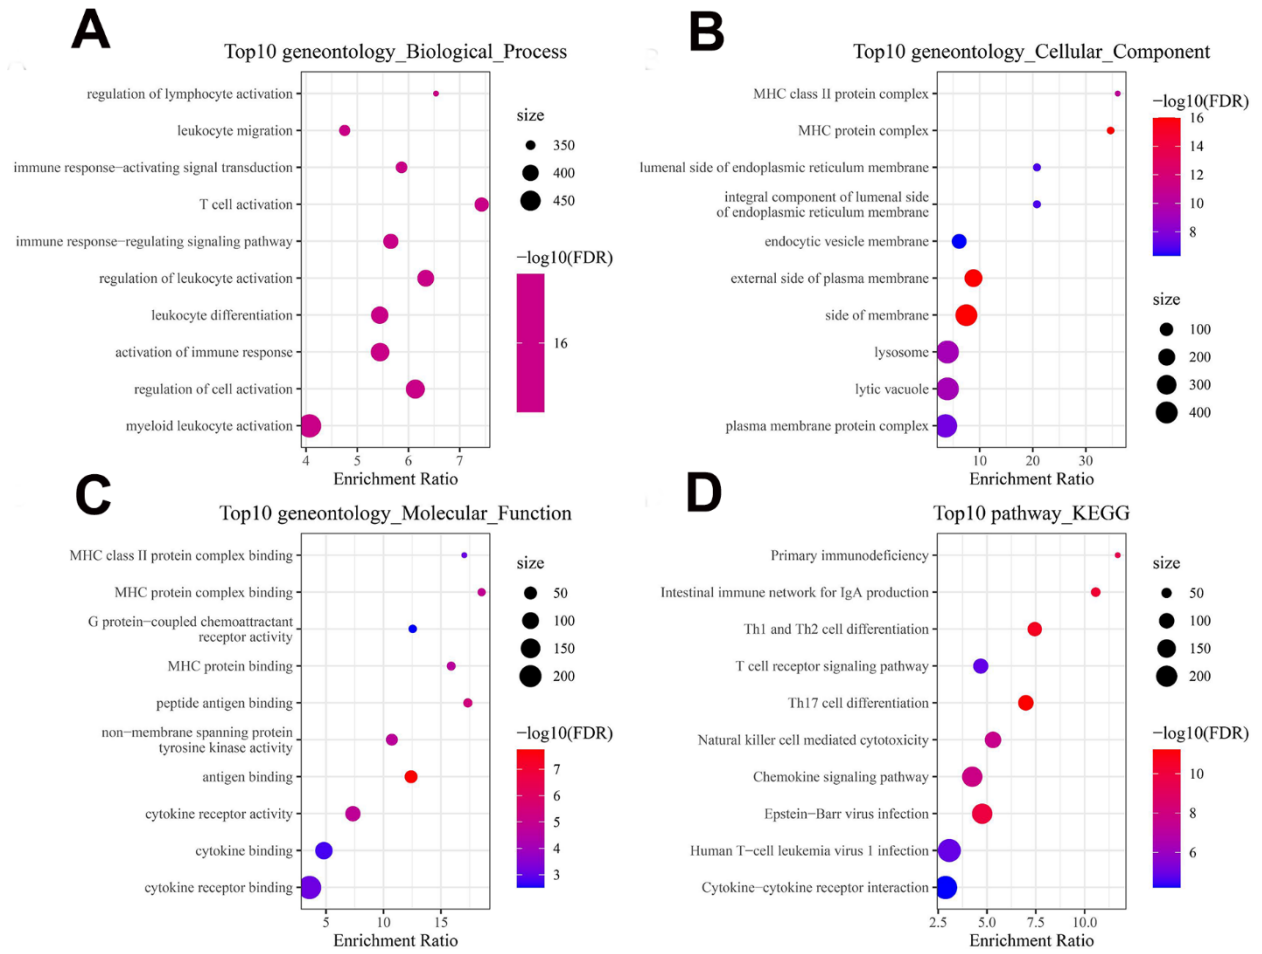

**Supplementary Figure 4. DNA sensors-related genes functional enrichment analysis. (A)** Top 10 geneontology biological process. **(B)** Top 10 geneontology cellular component. **(C)** Top 10 geneontology molecular function. **(D)** Top 10 pathway\_KEGG.

**A**

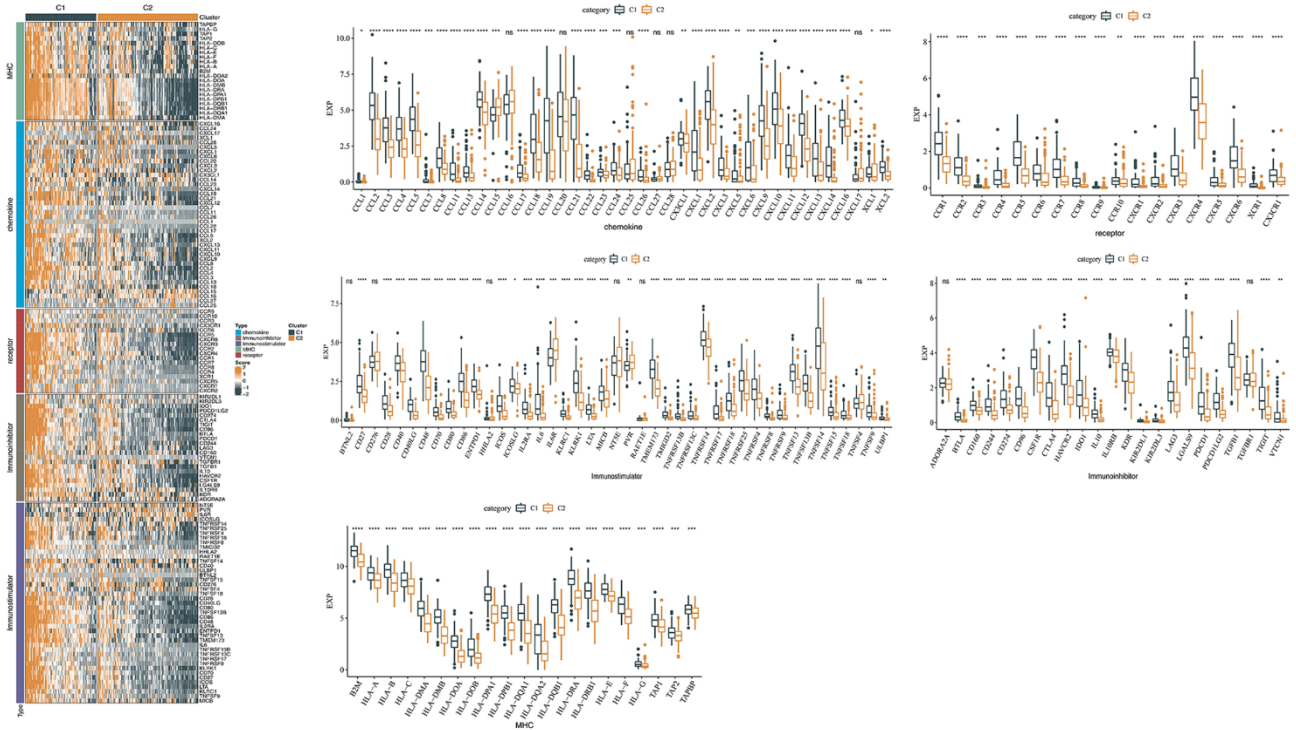

**B**

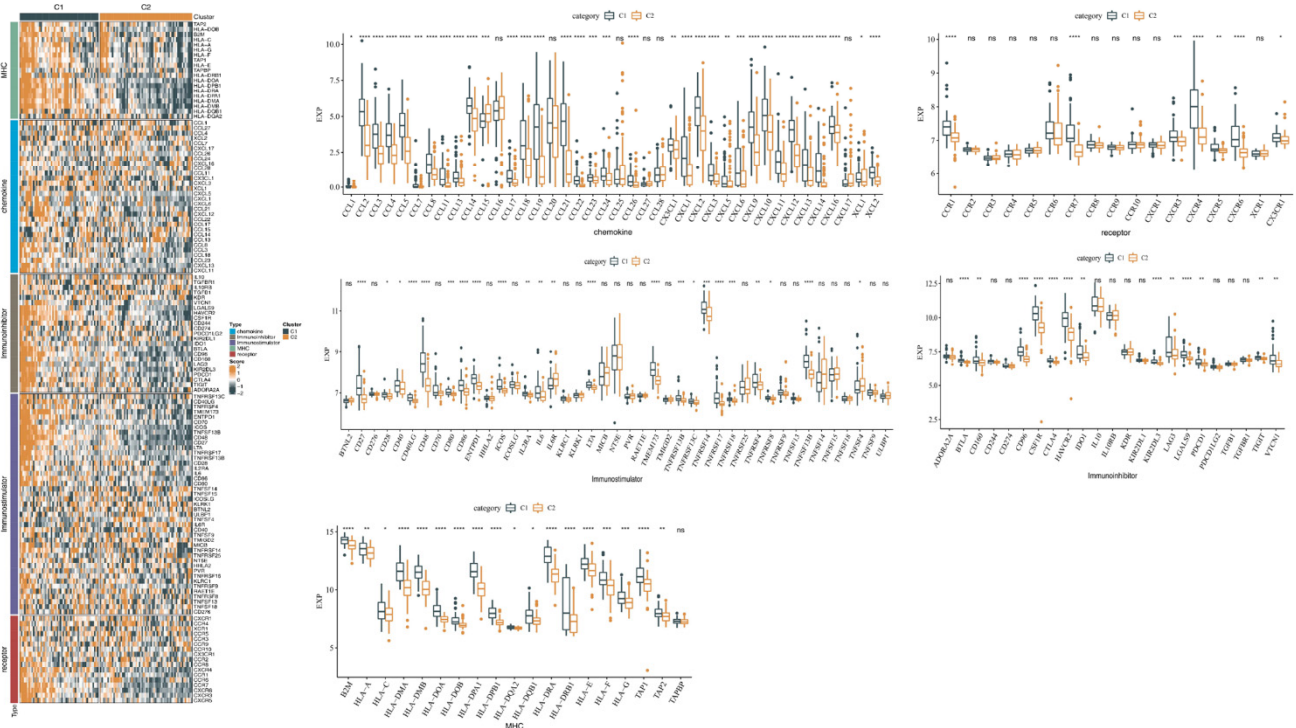

**Supplementary Figure 5. Analysis of the immunomodulatory functions of C1 and C2 subtypes. (A) Analysis in HCCDB18 dataset. (B) Analysis in GSE76427 dataset.**
