# Supplementary material for: Molecular subtypes based on DNA sensors predict prognosis and tumor immunophenotype in hepatocellular carcinoma
Source: Aging (Albany NY). 2023 Jul 14;15(14):6798–821. doi: 10.18632/aging.204870 (PMC10415551; doi:10.18632/aging.204870)
Supplement: Supplementary Table 1 [file aging-15-204870-s002.xls]

## Sheet: Supplementary Table 1
Supplementary Table 1. Differential genes between C1 and C2 subtypes.
	logFC	AveExpr	t	P.Value	adj.P.Val	B
GIMAP1	-0.895149	1.81252	-16.0392	3.60286e-44	7.00504e-40	89.5836
CD48	-1.39906	2.24551	-15.0254	4.84385e-40	4.70895e-36	80.2003
SLAMF6	-1.16582	1.27213	-14.8339	2.87455e-39	1.86299e-35	78.4425
CXCR6	-1.14402	1.26322	-14.7851	4.52267e-39	2.19836e-35	77.9952
GIMAP4	-1.19008	4.16175	-14.7486	6.34769e-39	2.46836e-35	77.6606
HCLS1	-1.27397	3.43461	-14.7132	8.8144e-39	2.85631e-35	77.3365
S1PR4	-1.07932	1.48365	-14.5694	3.33642e-38	9.26714e-35	76.0226
GZMK	-1.48629	1.62925	-14.5271	4.9329e-38	1.19888e-34	75.6367
ARHGAP15	-0.814655	1.23009	-14.2811	4.76327e-37	1.02902e-33	73.3984
LCK	-1.31142	1.86542	-14.2691	5.31485e-37	1.03337e-33	73.2903
KLRB1	-1.29998	2.31161	-14.1206	2.07783e-36	3.67266e-33	71.9445
CD3E	-1.57642	2.59398	-14.0778	3.07753e-36	4.98637e-33	71.5568
CD6	-1.09006	1.3334	-13.9154	1.35895e-35	2.03247e-32	70.091
SLA	-1.11344	1.67663	-13.7587	5.66878e-35	7.87272e-32	68.6813
FGL2	-1.36654	2.99892	-13.6794	1.16564e-34	1.5109e-31	67.9698
ITM2A	-1.53336	2.82039	-13.5653	3.27987e-34	3.87707e-31	66.9488
MS4A7	-1.23269	2.8164	-13.5617	3.38992e-34	3.87707e-31	66.9163
JCHAIN	-2.59123	3.05569	-13.5273	4.62713e-34	4.76724e-31	66.6092
CD2	-1.63059	2.91537	-13.5266	4.65862e-34	4.76724e-31	66.6025
RASAL3	-0.974206	1.99417	-13.5151	5.16561e-34	5.02175e-31	66.5006
SELPLG	-1.32899	3.1019	-13.5023	5.79976e-34	5.3488e-31	66.3863
GZMA	-1.54007	3.17445	-13.4976	6.05223e-34	5.3488e-31	66.3442
CMKLR1	-1.03025	1.8575	-13.4897	6.4998e-34	5.49459e-31	66.2738
AOAH	-1.17589	1.96414	-13.4775	7.26315e-34	5.88406e-31	66.1642
CCR5	-1.13362	1.45517	-13.3924	1.56517e-33	1.21726e-30	65.4065
CD247	-0.928944	1.46227	-13.3664	1.97968e-33	1.47925e-30	65.1747
CD96	-0.925196	1.13024	-13.3623	2.05419e-33	1.47925e-30	65.1382
GPR171	-0.934635	0.90818	-13.3111	3.25823e-33	2.26249e-30	64.683
SASH3	-1.29071	2.59174	-13.2487	5.70857e-33	3.8273e-30	64.1296
HLA-DOA	-1.48314	2.49012	-13.2433	5.99197e-33	3.88339e-30	64.0818
ABI3	-1.00833	2.93886	-13.2336	6.53828e-33	4.10077e-30	63.9957
MPEG1	-1.24423	3.52725	-13.2262	6.98678e-33	4.24512e-30	63.9302
CCL5	-1.76301	4.43207	-13.2191	7.45237e-33	4.26167e-30	63.8665
TMC8	-1.09154	1.92576	-13.2191	7.45239e-33	4.26167e-30	63.8665
CST7	-1.43807	2.9594	-13.2011	8.76031e-33	4.86648e-30	63.707
C16orf54	-0.900931	1.08236	-13.1491	1.39637e-32	7.54158e-30	63.2469
SH2D1A	-0.986588	0.995965	-13.1456	1.44035e-32	7.56884e-30	63.2163
GIMAP8	-0.929134	2.65305	-13.1262	1.71408e-32	8.77022e-30	63.0446
SCIMP	-0.811532	1.11372	-13.0982	2.20265e-32	1.09811e-29	62.7971
CYTIP	-1.19192	1.71996	-13.0682	2.88077e-32	1.40027e-29	62.5323
SLAMF1	-0.710844	0.791678	-13.0586	3.14049e-32	1.48928e-29	62.4471
MS4A6A	-1.27278	2.93402	-13.032	3.98418e-32	1.84439e-29	62.2123
BIN2	-0.974026	1.73394	-13.0158	4.60164e-32	2.08069e-29	62.0702
CD8A	-1.50781	1.80501	-12.9687	7.01015e-32	3.09769e-29	61.6548
IL7R	-1.45261	1.67768	-12.9333	9.61243e-32	4.15321e-29	61.3433
CD5	-1.1219	1.45971	-12.9006	1.28576e-31	5.43457e-29	61.0563
PRF1	-1.24672	2.4964	-12.8534	1.95764e-31	8.09838e-29	60.6415
IL16	-0.757907	1.24953	-12.8484	2.04644e-31	8.28937e-29	60.5977
GMFG	-1.0245	4.20802	-12.8423	2.16093e-31	8.5745e-29	60.544
EVI2B	-1.2665	2.58359	-12.8186	2.66636e-31	1.03684e-28	60.3366
SLA2	-0.844181	1.10378	-12.8061	2.98078e-31	1.13638e-28	60.2266
RUNX3	-1.05624	1.65349	-12.7878	3.50699e-31	1.28653e-28	60.0662
CLEC2B	-1.0399	2.36838	-12.7775	3.84318e-31	1.36461e-28	59.9759
HLA-DPB1	-1.55593	6.35471	-12.777	3.86017e-31	1.36461e-28	59.9716
CALHM6	-1.53404	2.65557	-12.7691	4.13816e-31	1.43676e-28	59.903
CD69	-1.05344	1.35395	-12.7653	4.28157e-31	1.46046e-28	59.8693
TBX21	-0.664507	0.825242	-12.706	7.24346e-31	2.42818e-28	59.3506
ITK	-0.698973	0.658926	-12.6765	9.39777e-31	3.09696e-28	59.0937
GAB3	-0.595536	0.933341	-12.6642	1.04861e-30	3.38334e-28	58.9856
ARHGDIB	-1.06876	5.9312	-12.6628	1.06148e-30	3.38334e-28	58.9736
CD52	-1.58446	4.22152	-12.6381	1.32015e-30	4.13995e-28	58.7584
CTSW	-1.28968	2.1573	-12.6291	1.4293e-30	4.41109e-28	58.68
LCP2	-1.05758	2.14952	-12.6257	1.47335e-30	4.47598e-28	58.6501
UBASH3A	-0.730648	0.726078	-12.6212	1.53268e-30	4.58461e-28	58.6111
GPR65	-0.706528	0.913703	-12.5991	1.86343e-30	5.48951e-28	58.4184
IKZF1	-0.842914	1.08436	-12.526	3.55014e-30	1.03023e-27	57.7825
CD53	-1.43686	3.85827	-12.4987	4.51494e-30	1.29094e-27	57.5453
TMEM173	-1.10791	3.05118	-12.4939	4.70795e-30	1.30891e-27	57.504
HLA-DQA1	-1.60825	3.57584	-12.4938	4.71242e-30	1.30891e-27	57.5031
GPSM3	-1.16052	3.72696	-12.4419	7.4416e-30	2.03785e-27	57.0523
SRGN	-1.35703	5.64569	-12.4333	8.02377e-30	2.16675e-27	56.978
GIMAP6	-1.02139	2.70161	-12.4277	8.42773e-30	2.23003e-27	56.9296
NCKAP1L	-1.03407	1.74708	-12.4269	8.48748e-30	2.23003e-27	56.9226
SLAMF7	-1.3691	1.66299	-12.4156	9.37183e-30	2.42955e-27	56.8248
SIT1	-1.13231	1.47415	-12.413	9.58454e-30	2.452e-27	56.8027
IKZF3	-0.95013	1.1032	-12.3958	1.11536e-29	2.81636e-27	56.6531
PARVG	-0.84026	1.39302	-12.3763	1.32262e-29	3.29688e-27	56.485
ARHGAP25	-0.862923	1.99026	-12.3578	1.55605e-29	3.82965e-27	56.3247
C1orf162	-1.05405	2.61223	-12.3506	1.65629e-29	4.00313e-27	56.2631
P2RY13	-0.867844	1.20879	-12.3499	1.66771e-29	4.00313e-27	56.2563
PRKCH	-0.794221	1.78558	-12.3422	1.78376e-29	4.22946e-27	56.19
DPEP2	-0.599944	1.06842	-12.3247	2.07848e-29	4.8689e-27	56.0391
RNASE6	-1.31179	3.55963	-12.3082	2.40095e-29	5.55735e-27	55.8968
PYHIN1	-0.737087	0.752654	-12.2986	2.61109e-29	5.97263e-27	55.8141
CCL4	-1.24624	2.28813	-12.2919	2.77007e-29	6.2626e-27	55.7558
ARHGAP30	-1.07674	2.45482	-12.2748	3.21628e-29	7.18784e-27	55.6085
GPR68	-0.766289	0.92749	-12.2586	3.70477e-29	8.18544e-27	55.469
MAP4K1	-0.971287	1.67556	-12.2529	3.89497e-29	8.50898e-27	55.4196
ACAP1	-0.846292	1.4945	-12.2457	4.14747e-29	8.95992e-27	55.3577
HLA-DQB1	-1.68313	4.35925	-12.1743	7.72552e-29	1.63269e-26	54.7441
EOMES	-0.73077	0.668834	-12.1365	1.07364e-28	2.24461e-26	54.4195
IL18BP	-1.01899	2.7258	-12.1269	1.16729e-28	2.41443e-26	54.337
IL10RA	-1.08511	2.39017	-12.1222	1.21563e-28	2.48795e-26	54.297
HLA-DPA1	-1.67833	5.02706	-12.1181	1.26007e-28	2.55204e-26	54.2616
C1QB	-1.58114	6.86635	-12.106	1.39943e-28	2.80074e-26	54.1581
C1QA	-1.50971	7.23357	-12.105	1.41168e-28	2.80074e-26	54.1495
CD27	-1.37803	1.71866	-12.0965	1.51967e-28	2.98454e-26	54.0768
SNX20	-0.816077	1.04261	-12.0917	1.58553e-28	3.08275e-26	54.035
PRDM1	-0.828585	1.39642	-12.0779	1.78741e-28	3.44086e-26	53.9168
EVI2A	-1.02346	1.89728	-12.0503	2.27066e-28	4.32827e-26	53.6807
TAGAP	-0.894036	1.11429	-12.04	2.4825e-28	4.68614e-26	53.5928
GNGT2	-0.642897	1.11785	-12.037	2.54765e-28	4.73992e-26	53.5672
DOCK2	-0.861355	1.16187	-12.0365	2.55975e-28	4.73992e-26	53.5626
TNFSF13B	-1.0557	1.83116	-12.0348	2.59666e-28	4.7629e-26	53.5484
ATP2A3	-1.12888	2.1268	-12.0114	3.17965e-28	5.77775e-26	53.3487
LILRB2	-0.900379	1.75356	-12.0044	3.3788e-28	6.08279e-26	53.2888
SPN	-0.845434	1.14156	-11.9797	4.18347e-28	7.46231e-26	53.0781
CLEC12A	-0.601991	0.607994	-11.9756	4.33587e-28	7.66384e-26	53.0428
ZAP70	-0.950352	1.40882	-11.9634	4.8165e-28	8.43669e-26	52.9391
DOK2	-1.11974	2.7193	-11.924	6.77428e-28	1.176e-25	52.6027
MYO1F	-0.874817	2.08731	-11.9177	7.15159e-28	1.23052e-25	52.5493
FCMR	-1.06254	1.72028	-11.8923	8.89814e-28	1.51092e-25	52.3338
THEMIS2	-1.11161	2.43471	-11.8918	8.93669e-28	1.51092e-25	52.3295
PTPRC	-1.29548	2.11405	-11.8375	1.42729e-27	2.39231e-25	51.8678
COTL1	-1.2959	3.64761	-11.8355	1.45197e-27	2.41287e-25	51.8509
PTPN7	-0.941664	1.3316	-11.8208	1.64774e-27	2.715e-25	51.7262
LY86	-1.1031	2.56438	-11.8096	1.81414e-27	2.96406e-25	51.6313
CD3G	-0.839218	0.872727	-11.8008	1.95741e-27	3.17149e-25	51.5564
CD72	-0.98948	1.61475	-11.7964	2.03182e-27	3.26484e-25	51.5196
ARHGAP9	-0.962086	1.62536	-11.7854	2.23476e-27	3.56151e-25	51.4257
IL12RB1	-0.807202	1.15622	-11.7749	2.44442e-27	3.83281e-25	51.3373
TLR8	-0.725528	0.64897	-11.7173	4.00656e-27	6.1825e-25	50.85
FERMT3	-1.13954	3.39762	-11.6943	4.88082e-27	7.47227e-25	50.6554
NCR3	-0.682115	0.896261	-11.6603	6.52816e-27	9.91617e-25	50.3687
HLA-DRA	-1.61402	8.63706	-11.6239	8.91108e-27	1.34309e-24	50.0619
CORO1A	-1.32212	3.34881	-11.6133	9.75582e-27	1.4591e-24	49.9726
TRAF3IP3	-0.668911	0.847837	-11.598	1.11099e-26	1.64893e-24	49.8444
IL2RB	-1.12609	1.92074	-11.5961	1.12949e-26	1.66368e-24	49.8281
HLA-DMB	-1.30535	3.15987	-11.5933	1.15636e-26	1.69045e-24	49.805
PLCB2	-0.852351	1.71729	-11.5648	1.47414e-26	2.13894e-24	49.5656
PSTPIP1	-0.87873	1.26233	-11.5508	1.66158e-26	2.39305e-24	49.4476
CXCR3	-1.07531	1.48227	-11.5419	1.79245e-26	2.56255e-24	49.3728
SLAMF8	-1.25421	2.34759	-11.5398	1.82441e-26	2.5892e-24	49.3554
MS4A4A	-1.12643	2.79736	-11.5322	1.947e-26	2.73082e-24	49.2913
FYB1	-1.12309	1.80033	-11.5318	1.95229e-26	2.73082e-24	49.2886
HLA-DRB1	-1.59868	8.09084	-11.5239	2.08796e-26	2.89973e-24	49.2224
LST1	-1.08594	2.85172	-11.5149	2.2543e-26	3.10854e-24	49.1468
AIF1	-1.22773	4.6588	-11.4761	3.13561e-26	4.26334e-24	48.8215
NLRC3	-0.591158	0.899114	-11.4556	3.73237e-26	5.03947e-24	48.6497
CCR7	-0.938512	1.10468	-11.4256	4.81355e-26	6.41027e-24	48.3989
GBP5	-1.30175	1.51388	-11.4136	5.32694e-26	7.04569e-24	48.299
PIK3R5	-0.694224	1.13674	-11.3971	6.12435e-26	8.04566e-24	48.1615
WAS	-0.929759	3.0001	-11.394	6.28586e-26	8.20241e-24	48.1359
LILRB1	-0.814723	1.18044	-11.393	6.34252e-26	8.22118e-24	48.127
PDCD1LG2	-0.83828	1.02333	-11.376	7.32127e-26	9.36496e-24	47.9856
FCN1	-0.851591	1.18638	-11.3727	7.52691e-26	9.56507e-24	47.9582
CD84	-0.82474	1.17518	-11.3377	1.01189e-25	1.27754e-23	47.6665
INPP5D	-0.872602	2.00343	-11.3328	1.05518e-25	1.31512e-23	47.6253
CD163	-1.29418	3.19363	-11.3203	1.17187e-25	1.45125e-23	47.5219
CD37	-1.06931	2.32547	-11.3116	1.2617e-25	1.5526e-23	47.4491
RCSD1	-0.88684	1.80667	-11.301	1.37977e-25	1.68723e-23	47.3609
IGSF6	-1.03542	2.65941	-11.2971	1.42483e-25	1.73144e-23	47.3292
CFP	-0.904864	1.36778	-11.2877	1.54341e-25	1.86389e-23	47.2504
TNFSF8	-0.59921	0.735015	-11.2805	1.63985e-25	1.95606e-23	47.1907
PIK3CD	-0.935458	1.71424	-11.2296	2.51667e-25	2.98364e-23	46.7685
IGLL5	-2.04183	1.86458	-11.227	2.57171e-25	3.03041e-23	46.7471
HCK	-1.14431	2.66656	-11.1931	3.41774e-25	4.00308e-23	46.4668
PRKCB	-0.709211	0.832436	-11.1802	3.80887e-25	4.43448e-23	46.36
C1QC	-1.42871	6.86094	-11.1413	5.27797e-25	6.10831e-23	46.0385
CCL19	-2.45292	3.01375	-11.132	5.70228e-25	6.56032e-23	45.9623
GNG2	-0.736288	1.65347	-11.1268	5.96019e-25	6.8167e-23	45.9187
NFAM1	-0.833757	1.3756	-11.1027	7.2908e-25	8.28976e-23	45.7201
GIMAP7	-1.02827	3.89627	-11.0825	8.62839e-25	9.75359e-23	45.5541
EBI3	-1.0346	2.20854	-11.0725	9.38344e-25	1.04852e-22	45.4715
CPNE5	-0.70479	1.09569	-11.0614	1.02943e-24	1.14372e-22	45.3802
FAM78A	-0.718016	1.54813	-11.0424	1.2054e-24	1.3277e-22	45.2246
CD40LG	-0.731377	0.931266	-11.0421	1.20867e-24	1.3277e-22	45.222
HAPLN3	-1.04323	1.48804	-11.036	1.27202e-24	1.38943e-22	45.1716
FLI1	-0.732252	1.82918	-11.0287	1.35158e-24	1.46809e-22	45.1118
CD86	-0.97719	1.93191	-11.0185	1.47104e-24	1.58897e-22	45.0284
FGD2	-0.630817	0.985786	-11.0172	1.48756e-24	1.59794e-22	45.0174
VAV1	-0.936522	1.69532	-11.0114	1.56175e-24	1.66841e-22	44.9694
JAK3	-1.0302	1.67393	-11.0089	1.59406e-24	1.69363e-22	44.9492
LILRA5	-0.781853	1.20429	-11.0049	1.64742e-24	1.73202e-22	44.9168
KCTD12	-1.1567	2.99114	-11.0049	1.64802e-24	1.73202e-22	44.9164
NRROS	-0.772341	1.92761	-11.0036	1.6662e-24	1.74172e-22	44.9056
CD8B	-1.1626	1.20599	-10.9809	2.01249e-24	2.08132e-22	44.7195
LAPTM5	-1.23428	5.62615	-10.9768	2.08279e-24	2.14263e-22	44.6857
CYBB	-1.37218	2.8723	-10.9458	2.69424e-24	2.75706e-22	44.4321
CNRIP1	-0.679049	1.62019	-10.9136	3.51966e-24	3.57057e-22	44.1687
ITGB2	-1.24893	3.65504	-10.9133	3.52595e-24	3.57057e-22	44.167
NKG7	-1.40081	3.71556	-10.905	3.77782e-24	3.78748e-22	44.099
CCR2	-0.788907	0.972526	-10.905	3.7791e-24	3.78748e-22	44.0987
CELF2	-0.814305	1.23023	-10.904	3.81003e-24	3.7989e-22	44.0906
GZMH	-1.10948	2.26011	-10.8873	4.37372e-24	4.33868e-22	43.9547
PTPN22	-0.6428	0.734878	-10.8839	4.49927e-24	4.44057e-22	43.9268
CSF1R	-1.18974	3.44701	-10.8528	5.82197e-24	5.717e-22	43.6729
DAPP1	-0.617437	0.675989	-10.8302	7.01532e-24	6.85422e-22	43.4891
CLEC10A	-0.999839	2.11561	-10.8276	7.16719e-24	6.96758e-22	43.468
RASSF2	-0.908184	1.96874	-10.8073	8.47397e-24	8.19699e-22	43.303
PTGER2	-0.681131	0.836724	-10.8044	8.68223e-24	8.35686e-22	43.2791
TIGIT	-0.840866	0.840708	-10.8028	8.79244e-24	8.42125e-22	43.2667
FPR3	-1.16485	2.63446	-10.7927	9.55609e-24	9.10779e-22	43.1846
AXL	-1.00622	2.44598	-10.7783	1.07659e-23	1.02108e-21	43.0672
SIGLEC7	-0.732889	1.11866	-10.7603	1.24842e-23	1.1783e-21	42.9213
GBP4	-1.10653	3.26902	-10.7173	1.77751e-23	1.66154e-21	42.5732
BTK	-0.751361	1.23309	-10.7152	1.80843e-23	1.68236e-21	42.5562
ACKR1	-1.24086	1.30985	-10.6978	2.08698e-23	1.93224e-21	42.4151
MZB1	-1.62605	1.53306	-10.6831	2.35455e-23	2.16964e-21	42.2963
ADA2	-1.14381	3.49716	-10.6497	3.09684e-23	2.84018e-21	42.0263
EFEMP1	-2.06221	3.10552	-10.6476	3.15075e-23	2.87606e-21	42.0093
FASLG	-0.669748	0.68195	-10.636	3.46201e-23	3.14541e-21	41.9165
SAMSN1	-0.959731	1.56621	-10.6152	4.10494e-23	3.7122e-21	41.7487
CSF2RB	-0.879828	1.40477	-10.6006	4.62718e-23	4.1651e-21	41.6308
HCST	-1.13946	3.5842	-10.5932	4.91493e-23	4.40374e-21	41.5714
MYO1G	-0.719585	1.07308	-10.5907	5.01465e-23	4.47247e-21	41.5516
C3AR1	-1.06649	2.69752	-10.5879	5.13277e-23	4.55691e-21	41.5286
CD300LF	-0.78821	1.30766	-10.5291	8.28631e-23	7.29008e-21	41.0569
SLC9A9	-0.836177	1.5936	-10.5197	8.94991e-23	7.83843e-21	40.981
APOBEC3C	-1.19522	2.72805	-10.5161	9.21727e-23	8.03638e-21	40.952
ENG	-0.978639	5.4804	-10.5154	9.26598e-23	8.03911e-21	40.9468
PLEKHO2	-0.875883	3.74474	-10.5149	9.30309e-23	8.03911e-21	40.9429
SIRPG	-0.937961	1.1073	-10.4785	1.25096e-22	1.06677e-20	40.6512
SPOCK2	-1.01949	2.55905	-10.4739	1.29891e-22	1.10282e-20	40.6142
CLEC7A	-0.819739	1.23616	-10.4692	1.34935e-22	1.14067e-20	40.5767
SYTL3	-0.659514	1.00916	-10.4675	1.36714e-22	1.15071e-20	40.5638
RAC2	-1.30129	3.63786	-10.3919	2.52274e-22	2.10514e-20	39.9605
WIPF1	-0.965219	2.39773	-10.37	3.01307e-22	2.50355e-20	39.7856
PRKCQ	-0.625273	0.724613	-10.3429	3.74754e-22	3.10057e-20	39.5708
GPR132	-0.635753	0.831775	-10.3324	4.07902e-22	3.33229e-20	39.4873
CRTAM	-0.604769	0.531997	-10.3211	4.46713e-22	3.63407e-20	39.3978
ICOS	-0.629346	0.613192	-10.2974	5.4087e-22	4.38172e-20	39.2095
CD4	-1.13654	4.32943	-10.2775	6.34802e-22	5.10543e-20	39.0518
CARD16	-0.856414	2.67996	-10.2774	6.35455e-22	5.10543e-20	39.0508
CD79A	-1.47124	1.49131	-10.2763	6.40626e-22	5.1258e-20	39.0428
EMB	-0.987883	1.49173	-10.2519	7.79717e-22	6.21004e-20	38.8494
CD180	-0.609549	0.867429	-10.2514	7.82523e-22	6.21004e-20	38.8459
IL2RG	-1.4755	3.51028	-10.2323	9.12103e-22	7.20895e-20	38.695
RASGRP1	-0.610956	0.692436	-10.2304	9.26105e-22	7.28998e-20	38.68
FOLR2	-1.23068	4.24035	-10.2181	1.02283e-21	7.9867e-20	38.5822
P2RY10	-0.671105	0.607261	-10.2015	1.16809e-21	9.08446e-20	38.4515
CD3D	-1.42109	3.03517	-10.1843	1.33998e-21	1.03798e-19	38.3163
PILRA	-0.820506	2.23836	-10.1774	1.4159e-21	1.09243e-19	38.2621
ITPKB	-0.698597	2.05585	-10.1699	1.50373e-21	1.15562e-19	38.2028
LILRB5	-0.674992	1.40813	-10.1654	1.55874e-21	1.19317e-19	38.1674
SIGLEC1	-0.86574	1.85309	-10.1643	1.5727e-21	1.19914e-19	38.1587
INMT	-1.32478	2.1939	-10.1519	1.73658e-21	1.31892e-19	38.0611
APOBEC3H	-0.612048	0.925917	-10.149	1.77688e-21	1.34427e-19	38.0385
HLA-DRB5	-1.66	6.32003	-10.1482	1.78818e-21	1.34758e-19	38.0323
TNFAIP8L2	-0.934296	2.57388	-10.1378	1.9441e-21	1.45943e-19	37.95
SLC15A3	-0.883037	3.05591	-10.1319	2.03635e-21	1.5228e-19	37.9043
LSP1	-1.1365	3.21965	-10.1305	2.05926e-21	1.53403e-19	37.8933
FPR1	-1.01203	1.32959	-10.1229	2.1894e-21	1.62475e-19	37.833
KCNK6	-0.722523	1.53063	-10.1185	2.26717e-21	1.67607e-19	37.7986
EPB41L3	-0.674137	0.990624	-10.0955	2.72216e-21	1.99724e-19	37.6186
UCP2	-1.1158	4.11535	-10.0802	3.07567e-21	2.24813e-19	37.4984
GLIPR2	-0.980566	2.60861	-10.0722	3.27817e-21	2.38622e-19	37.4357
PLA2G2D	-1.22297	0.970568	-10.0508	3.88433e-21	2.80755e-19	37.2687
ETS1	-0.96032	3.71904	-10.0251	4.76591e-21	3.43198e-19	37.0673
ECSCR	-0.708409	2.59837	-9.98876	6.35403e-21	4.52532e-19	36.7843
CD74	-1.30636	9.47315	-9.9854	6.5257e-21	4.63062e-19	36.758
PLEK	-1.21418	2.81185	-9.95308	8.42567e-21	5.93552e-19	36.5066
TRAT1	-0.639909	0.576921	-9.95157	8.52676e-21	5.98504e-19	36.4948
IL24	-0.605895	0.768162	-9.94882	8.71401e-21	6.09448e-19	36.4734
C1orf54	-0.695378	3.17408	-9.94786	8.78048e-21	6.11895e-19	36.466
PDE6G	-0.645918	1.21941	-9.93927	9.39658e-21	6.52492e-19	36.3992
TYROBP	-1.11751	6.10708	-9.89974	1.28343e-20	8.88032e-19	36.0924
ZEB2	-0.637454	1.15916	-9.89865	1.29452e-20	8.89378e-19	36.084
CCDC80	-1.46101	1.95435	-9.89305	1.35283e-20	9.26168e-19	36.0406
BASP1	-1.36324	2.55363	-9.86461	1.69214e-20	1.15036e-18	35.8204
SMOC2	-1.20232	2.34174	-9.81982	2.40522e-20	1.62378e-18	35.4744
RAMP3	-1.13646	4.15679	-9.81624	2.47365e-20	1.6642e-18	35.4468
IFITM1	-1.3936	5.75485	-9.81278	2.54179e-20	1.70414e-18	35.42
SIGLEC10	-0.841915	1.22277	-9.79731	2.86935e-20	1.91714e-18	35.3008
CLEC4E	-0.681592	0.789473	-9.79367	2.95215e-20	1.96571e-18	35.2728
SHISA3	-1.05876	1.05356	-9.78734	3.10225e-20	2.0586e-18	35.224
CERKL	-0.726752	1.41419	-9.78324	3.2033e-20	2.11843e-18	35.1925
HVCN1	-0.632531	1.38747	-9.74808	4.21679e-20	2.7605e-18	34.922
CIITA	-0.75598	1.36983	-9.74489	4.32317e-20	2.82065e-18	34.8975
MNDA	-0.996521	1.8367	-9.74346	4.37168e-20	2.84276e-18	34.8865
TBC1D10C	-0.933339	1.84736	-9.74009	4.48817e-20	2.90878e-18	34.8607
GATA3	-0.700121	0.877674	-9.70581	5.86362e-20	3.77505e-18	34.5977
PPP1R16B	-0.733029	1.44876	-9.70303	5.9919e-20	3.8449e-18	34.5764
PECAM1	-0.783288	4.71413	-9.69316	6.47063e-20	4.13844e-18	34.5008
IL21R	-0.605866	0.540075	-9.68213	7.05051e-20	4.49453e-18	34.4163
APOBEC3G	-0.819296	1.60984	-9.65823	8.49006e-20	5.35949e-18	34.2336
SELP	-0.806107	0.994673	-9.65136	8.95499e-20	5.63469e-18	34.1811
NCF4	-0.944169	2.84624	-9.63981	9.79509e-20	6.14342e-18	34.0929
SVEP1	-0.756069	0.804882	-9.61242	1.21127e-19	7.52421e-18	33.884
CYTH4	-0.799959	2.02755	-9.59872	1.34687e-19	8.31342e-18	33.7797
OMD	-0.611153	0.477955	-9.59651	1.37007e-19	8.42986e-18	33.7629
SPI1	-1.04101	3.64354	-9.59282	1.40983e-19	8.64709e-18	33.7347
TBXAS1	-0.737325	1.75524	-9.58908	1.45115e-19	8.87258e-18	33.7063
GZMM	-0.941534	1.94589	-9.56022	1.81391e-19	1.10557e-17	33.4869
FAM167B	-0.727275	3.64882	-9.53295	2.23868e-19	1.35176e-17	33.28
LYL1	-0.60838	1.64245	-9.52666	2.34988e-19	1.41451e-17	33.2323
CXCR4	-1.21299	4.55684	-9.52495	2.38104e-19	1.42884e-17	33.2193
ITGA9	-0.85501	1.8756	-9.50774	2.71851e-19	1.62135e-17	33.089
SELL	-0.970742	2.09744	-9.50498	2.77689e-19	1.6511e-17	33.0681
DCN	-1.75385	2.74289	-9.49817	2.92638e-19	1.73468e-17	33.0165
PTGER4	-0.838818	1.45261	-9.47981	3.37007e-19	1.98558e-17	32.8777
CD300A	-0.888184	2.28315	-9.4789	3.39366e-19	1.99344e-17	32.8709
IL2RA	-0.723702	0.826275	-9.47076	3.61266e-19	2.11569e-17	32.8094
CASP1	-0.856743	2.70289	-9.45485	4.08216e-19	2.38347e-17	32.6892
CCL21	-2.34438	4.09936	-9.45373	4.11716e-19	2.39671e-17	32.6808
GGT5	-1.26341	2.89816	-9.44093	4.54207e-19	2.63616e-17	32.5843
AIM2	-0.716809	0.620943	-9.43301	4.82609e-19	2.79267e-17	32.5246
RHOH	-0.597161	0.77628	-9.42248	5.23161e-19	3.01835e-17	32.4453
WDFY4	-0.593333	0.713111	-9.41563	5.51345e-19	3.16773e-17	32.3937
SIGLEC9	-0.667251	1.25305	-9.4154	5.52312e-19	3.16773e-17	32.392
LMO2	-0.684041	2.97515	-9.40242	6.09972e-19	3.47792e-17	32.2943
CTLA4	-0.798981	0.999221	-9.38878	6.77032e-19	3.83777e-17	32.1918
P2RY8	-0.830935	2.03501	-9.38636	6.89657e-19	3.89796e-17	32.1736
TRIM22	-1.10978	2.98893	-9.37145	7.72813e-19	4.3553e-17	32.0617
MILR1	-0.708828	1.50737	-9.35239	8.93827e-19	5.00826e-17	31.9187
HAVCR2	-0.943213	2.0937	-9.35048	9.06873e-19	5.06676e-17	31.9044
TNFRSF1B	-0.826971	4.85095	-9.34915	9.16172e-19	5.10405e-17	31.8944
CXorf21	-0.593794	0.924759	-9.3443	9.50652e-19	5.28101e-17	31.8581
DEF6	-0.925818	2.58018	-9.32348	1.114e-18	6.15329e-17	31.7022
ANXA1	-0.977257	3.60717	-9.32045	1.13999e-18	6.25076e-17	31.6795
CCR1	-0.908346	2.08089	-9.3203	1.14129e-18	6.25076e-17	31.6784
SAMD9L	-0.857063	1.75067	-9.30559	1.27639e-18	6.97105e-17	31.5684
LCP1	-1.13109	4.75184	-9.29927	1.3392e-18	7.29357e-17	31.5212
CLEC4A	-0.644526	1.64595	-9.29814	1.35067e-18	7.3355e-17	31.5128
SH2D2A	-0.891353	1.65383	-9.29008	1.436e-18	7.7772e-17	31.4526
NCF1	-0.646482	0.870331	-9.28541	1.48776e-18	8.01291e-17	31.4178
PTGIR	-0.733946	1.34881	-9.26308	1.76246e-18	9.44011e-17	31.2513
MOXD1	-1.05975	1.23259	-9.25124	1.92791e-18	1.02979e-16	31.1631
GPR183	-1.10726	2.31669	-9.24534	2.01609e-18	1.07394e-16	31.1191
CCL3	-0.946131	2.41368	-9.23083	2.25004e-18	1.19529e-16	31.0112
GZMB	-0.938777	1.67103	-9.22811	2.29677e-18	1.21678e-16	30.991
DUSP2	-1.03496	2.08965	-9.21688	2.50034e-18	1.31745e-16	30.9075
CCN5	-0.713302	0.625527	-9.20678	2.69858e-18	1.41807e-16	30.8326
ITGA4	-0.662726	0.940261	-9.19115	3.03657e-18	1.59138e-16	30.7166
GPBAR1	-0.79232	1.16336	-9.18294	3.23058e-18	1.68362e-16	30.6557
EGR2	-0.857254	1.29522	-9.18262	3.23856e-18	1.68362e-16	30.6533
CD79B	-0.767333	2.07972	-9.17611	3.40144e-18	1.76358e-16	30.6051
ST8SIA4	-0.644023	1.22615	-9.1626	3.7658e-18	1.9473e-16	30.5051
SEPTIN1	-0.684324	2.19751	-9.16127	3.80366e-18	1.96166e-16	30.4952
KLF2	-0.892678	3.55606	-9.15842	3.88624e-18	1.99895e-16	30.4741
CXCL9	-1.63805	3.71502	-9.10013	6.02256e-18	3.06536e-16	30.0437
CD300C	-0.621402	1.06885	-9.09857	6.09317e-18	3.0932e-16	30.0322
GPNMB	-1.21925	3.88861	-9.08786	6.60285e-18	3.34321e-16	29.9533
TNXB	-0.719744	0.974656	-9.07418	7.31556e-18	3.69445e-16	29.8526
STAB1	-0.809408	3.52258	-9.05464	8.46675e-18	4.25372e-16	29.709
SYNPO2	-0.658184	1.20967	-9.05261	8.59626e-18	4.30766e-16	29.6941
CTSS	-1.09579	5.52011	-9.01045	1.17767e-17	5.84116e-16	29.3848
GNA15	-0.742725	1.66689	-9.00483	1.22809e-17	6.07576e-16	29.3436
PMP22	-1.0287	3.11688	-8.98248	1.45039e-17	7.15736e-16	29.1802
LILRB4	-0.858748	1.5551	-8.98142	1.46189e-17	7.19583e-16	29.1724
MFAP4	-1.8109	2.96158	-8.95778	1.74287e-17	8.53567e-16	28.9997
APLNR	-1.22867	3.42692	-8.92874	2.16201e-17	1.05618e-15	28.788
THBD	-0.941702	2.5452	-8.915	2.39367e-17	1.1635e-15	28.6881
ARHGAP31	-0.641816	1.63307	-8.88682	2.94872e-17	1.42973e-15	28.4832
KCNN4	-0.68464	0.939184	-8.88472	2.99478e-17	1.44845e-15	28.468
FCER1G	-1.08695	5.2053	-8.88095	3.07946e-17	1.48203e-15	28.4406
VSIG4	-1.14316	2.81218	-8.87477	3.22316e-17	1.54736e-15	28.3958
CPXM2	-0.876298	1.37073	-8.8699	3.34125e-17	1.59616e-15	28.3605
COL14A1	-1.30293	2.29026	-8.86133	3.55947e-17	1.69625e-15	28.2984
RGS10	-1.00594	3.51188	-8.83934	4.18607e-17	1.98997e-15	28.1391
GNB4	-0.670282	1.64333	-8.83318	4.3802e-17	2.07718e-15	28.0946
CRISPLD2	-1.10427	2.15643	-8.80414	5.42382e-17	2.5596e-15	27.8848
PRELP	-1.39144	2.34963	-8.79961	5.60725e-17	2.63975e-15	27.8521
HEPH	-0.666493	1.22168	-8.78648	6.17496e-17	2.89301e-15	27.7574
MAL	-0.59115	0.651813	-8.76839	7.05098e-17	3.29548e-15	27.6271
IFI16	-1.00801	3.27178	-8.76647	7.15098e-17	3.33421e-15	27.6133
CLIC2	-0.816684	2.44916	-8.7498	8.07972e-17	3.74033e-15	27.4934
FCGR1A	-0.752274	1.01423	-8.72382	9.77025e-17	4.50149e-15	27.3069
IGFBP7	-0.948045	7.87039	-8.72181	9.91502e-17	4.55739e-15	27.2925
LDHB	-1.04051	4.29883	-8.71965	1.00728e-16	4.61901e-15	27.277
CDC42EP3	-0.607032	1.52782	-8.70975	1.08283e-16	4.94211e-15	27.206
FCGR3A	-1.19454	4.15954	-8.69717	1.18689e-16	5.40437e-15	27.1159
TEK	-0.840791	1.7258	-8.69511	1.20486e-16	5.47338e-15	27.1011
DOCK8	-0.749184	1.35717	-8.6886	1.26344e-16	5.72612e-15	27.0545
FMNL1	-0.83741	2.0582	-8.6774	1.37088e-16	6.17085e-15	26.9744
LAIR1	-0.83789	1.89835	-8.67737	1.37109e-16	6.17085e-15	26.9743
RIPK3	-0.597827	0.980197	-8.67373	1.408e-16	6.32234e-15	26.9482
LUM	-2.04053	3.63133	-8.65941	1.56264e-16	7.00055e-15	26.8459
CD1C	-0.840511	1.37516	-8.65688	1.59156e-16	7.11374e-15	26.8279
B2M	-0.753208	10.3076	-8.64518	1.73284e-16	7.72742e-15	26.7444
IRF4	-0.639875	0.528791	-8.64074	1.78972e-16	7.94465e-15	26.7127
PODN	-1.20889	1.84553	-8.63831	1.82155e-16	8.06753e-15	26.6954
FGR	-0.751698	1.96655	-8.62657	1.98359e-16	8.74535e-15	26.6118
MFNG	-0.674794	2.71652	-8.60779	2.27294e-16	9.97578e-15	26.4781
FBLN2	-1.37276	2.75396	-8.60117	2.3846e-16	1.03722e-14	26.4311
PLAAT4	-1.02109	6.04409	-8.59559	2.48294e-16	1.07758e-14	26.3914
SYT11	-0.685124	1.615	-8.58317	2.7163e-16	1.17624e-14	26.3032
EMILIN1	-1.34143	3.64283	-8.56634	3.06783e-16	1.32257e-14	26.1838
ADAMDEC1	-0.930463	0.945761	-8.55333	3.36983e-16	1.44635e-14	26.0917
S100A4	-1.1977	5.07699	-8.5472	3.52221e-16	1.50842e-14	26.0483
CLEC14A	-0.795856	4.18637	-8.54464	3.58781e-16	1.53314e-14	26.0302
THBS2	-1.57306	3.14173	-8.5395	3.72337e-16	1.58758e-14	25.9938
LPAR6	-0.688018	2.7172	-8.53737	3.78098e-16	1.60861e-14	25.9787
IL18	-0.993764	2.11892	-8.51495	4.44334e-16	1.88628e-14	25.8203
HK3	-0.786458	1.51764	-8.45175	6.99423e-16	2.94348e-14	25.3752
ALOX5AP	-1.05431	2.18652	-8.44039	7.58662e-16	3.18589e-14	25.2954
PLEKHO1	-0.814606	3.11721	-8.40799	9.56305e-16	3.98146e-14	25.0683
AEBP1	-1.61637	4.26615	-8.40362	9.86607e-16	4.09011e-14	25.0377
TNFRSF17	-0.657963	0.480367	-8.40062	1.00796e-15	4.16973e-14	25.0167
DOK3	-0.608831	1.47389	-8.3916	1.07493e-15	4.43734e-14	24.9536
RCAN2	-1.01289	2.19005	-8.37791	1.18507e-15	4.8713e-14	24.858
CXCL12	-1.30182	3.51345	-8.36637	1.28651e-15	5.26603e-14	24.7774
CD38	-0.813438	1.08513	-8.34366	1.51183e-15	6.16237e-14	24.6191
GAS1	-0.746337	0.97913	-8.33883	1.56458e-15	6.36403e-14	24.5855
LAG3	-0.94815	1.73705	-8.32965	1.66992e-15	6.77836e-14	24.5216
TIMP1	-1.62387	7.96996	-8.32548	1.72001e-15	6.96713e-14	24.4926
CCL4L2	-0.966333	2.15507	-8.32163	1.76758e-15	7.1301e-14	24.4658
CALHM2	-0.713583	2.28268	-8.31963	1.79284e-15	7.21703e-14	24.4519
ISLR	-1.55872	2.57886	-8.31818	1.81135e-15	7.27646e-14	24.4419
LOXL1	-1.0648	1.75982	-8.29724	2.10096e-15	8.42247e-14	24.2964
SH2D3C	-0.598424	2.78914	-8.29579	2.12266e-15	8.49194e-14	24.2863
ARHGEF6	-0.678634	1.93535	-8.25417	2.84802e-15	1.12549e-13	23.9981
CYYR1	-0.654135	2.70553	-8.25119	2.90843e-15	1.14703e-13	23.9775
EPSTI1	-0.950811	2.27358	-8.24885	2.95692e-15	1.16379e-13	23.9613
DOCK10	-0.634371	1.14194	-8.24436	3.05184e-15	1.19873e-13	23.9303
HLA-DOB	-0.902002	1.50178	-8.24075	3.13058e-15	1.22471e-13	23.9053
VIM	-0.82612	6.68622	-8.23377	3.28829e-15	1.28382e-13	23.8572
NRP2	-0.691458	1.74513	-8.23049	3.36496e-15	1.3085e-13	23.8346
SYK	-0.872905	1.98289	-8.22964	3.3852e-15	1.31374e-13	23.8287
GPR34	-0.776313	1.89988	-8.21289	3.80855e-15	1.47e-13	23.7132
MMP2	-1.36515	3.44157	-8.21281	3.81053e-15	1.47e-13	23.7126
LDB2	-0.702061	2.40364	-8.20987	3.89007e-15	1.49772e-13	23.6924
CD5L	-1.53041	2.28875	-8.19638	4.27672e-15	1.63044e-13	23.5995
TMEM204	-0.773519	3.85559	-8.1859	4.60285e-15	1.74451e-13	23.5275
TMEM119	-1.0806	1.57531	-8.18419	4.65859e-15	1.7622e-13	23.5157
DPT	-1.42827	1.91015	-8.14423	6.16217e-15	2.31296e-13	23.2415
MSR1	-0.767028	1.91426	-8.14138	6.28618e-15	2.35496e-13	23.222
LBH	-0.931344	3.59338	-8.13424	6.60781e-15	2.46594e-13	23.173
CCL18	-1.16063	2.21799	-8.1279	6.90672e-15	2.57256e-13	23.1297
SRPX	-1.11609	1.68657	-8.11909	7.34458e-15	2.73041e-13	23.0694
C11orf96	-1.07152	3.42569	-8.11525	7.54398e-15	2.79919e-13	23.0432
MYCT1	-0.613408	2.41644	-8.11274	7.67726e-15	2.84322e-13	23.026
GEM	-1.1607	2.50631	-8.09502	8.68586e-15	3.19847e-13	22.9051
ADAMTS2	-1.04273	2.19123	-8.09208	8.86548e-15	3.25844e-13	22.885
EMP1	-0.890654	2.85831	-8.07958	9.67086e-15	3.53441e-13	22.7998
SCARA5	-0.661211	0.478723	-8.06967	1.03601e-14	3.77919e-13	22.7323
GNG11	-0.622583	3.96117	-8.06101	1.1002e-14	4.00584e-13	22.6734
HLA-DMA	-1.09153	5.35045	-8.0498	1.18922e-14	4.30578e-13	22.5972
IRF8	-0.826112	2.7892	-8.01065	1.55954e-14	5.59448e-13	22.3316
PTAFR	-0.826474	1.80641	-8.00872	1.58043e-14	5.65192e-13	22.3185
RAB31	-0.861625	2.56539	-8.00864	1.58136e-14	5.65192e-13	22.3179
FYN	-0.607025	2.80662	-8.00406	1.63217e-14	5.82279e-13	22.287
CCL2	-1.18433	3.48883	-7.99864	1.6944e-14	6.03375e-13	22.2503
SIGLEC14	-0.660656	0.913849	-7.99604	1.72519e-14	6.13215e-13	22.2327
MGP	-1.3866	4.51907	-7.99572	1.72891e-14	6.13415e-13	22.2306
SEMA4D	-0.592502	1.1352	-7.97086	2.05227e-14	7.26818e-13	22.0626
CD93	-0.78826	3.7413	-7.94433	2.46333e-14	8.67655e-13	21.8837
MRVI1	-0.594309	1.28794	-7.94307	2.48479e-14	8.7363e-13	21.8753
NPDC1	-0.74419	3.74657	-7.94183	2.50612e-14	8.7954e-13	21.8669
OSCAR	-0.639925	1.34353	-7.9374	2.58351e-14	9.03438e-13	21.8371
MRC2	-1.04651	2.22076	-7.93341	2.65534e-14	9.26891e-13	21.8102
FBLN5	-1.13381	3.1314	-7.924	2.83245e-14	9.85175e-13	21.747
LXN	-0.854754	2.29419	-7.87865	3.8643e-14	1.3369e-12	21.4428
PREX1	-0.768283	3.14221	-7.87037	4.08916e-14	1.40718e-12	21.3874
C7	-1.8444	3.51146	-7.86809	4.15337e-14	1.42675e-12	21.3721
STK17B	-0.761367	2.01697	-7.86323	4.29356e-14	1.4723e-12	21.3396
F13A1	-1.08891	2.04862	-7.8584	4.43745e-14	1.51897e-12	21.3073
LRRC25	-0.773811	2.43892	-7.8549	4.54445e-14	1.55013e-12	21.284
PROCR	-0.901969	3.03052	-7.85379	4.57906e-14	1.55921e-12	21.2766
TLR4	-0.678633	1.95905	-7.84976	4.70673e-14	1.59153e-12	21.2496
CCND2	-0.747146	1.84891	-7.82984	5.39086e-14	1.81654e-12	21.1168
LRRC32	-0.875728	3.66507	-7.8274	5.48098e-14	1.84371e-12	21.1005
FBN1	-0.889312	2.0765	-7.8053	6.36978e-14	2.13531e-12	20.9534
DOCK11	-0.652663	1.40052	-7.80465	6.39788e-14	2.14103e-12	20.9491
ADAMTS1	-0.901401	2.89169	-7.79207	6.96802e-14	2.31985e-12	20.8655
CHST2	-0.619787	1.56114	-7.77565	7.7888e-14	2.58426e-12	20.7565
SP140	-0.601134	0.90154	-7.77272	7.94486e-14	2.63155e-12	20.7371
FOXF1	-0.592694	1.06595	-7.76271	8.50171e-14	2.80643e-12	20.6708
ITGAX	-0.731551	2.21279	-7.75511	8.95012e-14	2.94672e-12	20.6204
FCN3	-1.22978	2.23908	-7.755	8.95701e-14	2.94672e-12	20.6197
GSN	-0.745582	5.13927	-7.74843	9.3637e-14	3.07531e-12	20.5762
PDPN	-0.707654	0.711325	-7.72973	1.06244e-13	3.47762e-12	20.4526
ADAP2	-0.65737	2.37916	-7.72931	1.06542e-13	3.48151e-12	20.4498
WARS	-0.653013	4.54865	-7.72708	1.08154e-13	3.52826e-12	20.4351
C5AR1	-0.741594	2.686	-7.72203	1.119e-13	3.63218e-12	20.4018
STX11	-0.742637	1.69528	-7.71439	1.17814e-13	3.81777e-12	20.3514
NGFR	-1.11231	2.17685	-7.70693	1.23892e-13	4.00804e-12	20.3022
ABI3BP	-0.603444	0.810503	-7.70604	1.24631e-13	4.02525e-12	20.2964
TMSB4X	-0.834193	9.31999	-7.68803	1.40685e-13	4.5287e-12	20.1778
GASK1B	-0.661864	2.31144	-7.67142	1.57288e-13	5.04645e-12	20.0686
TIMD4	-0.681749	0.772764	-7.66971	1.59111e-13	5.09652e-12	20.0573
RGS1	-1.24636	2.90789	-7.66174	1.67845e-13	5.34985e-12	20.005
GJA4	-0.755239	4.12044	-7.64831	1.83648e-13	5.83442e-12	19.917
PTGIS	-0.936595	1.3452	-7.63311	2.03317e-13	6.43826e-12	19.8175
MS4A1	-0.612131	0.503493	-7.62862	2.09515e-13	6.61297e-12	19.7881
SGCA	-0.673034	1.01282	-7.62748	2.11117e-13	6.65274e-12	19.7806
EMP3	-0.887509	3.86534	-7.62248	2.1829e-13	6.86764e-12	19.7479
GSTP1	-1.08983	4.79506	-7.62014	2.21742e-13	6.96499e-12	19.7326
HAND2	-0.753052	0.846457	-7.60379	2.47316e-13	7.75575e-12	19.6258
MMRN2	-0.650575	3.3436	-7.60146	2.51188e-13	7.85186e-12	19.6106
HAMP	-1.86515	2.68518	-7.59979	2.53988e-13	7.92662e-12	19.5997
XCL2	-0.771962	1.43502	-7.58644	2.77628e-13	8.63667e-12	19.5127
FXYD6	-0.643593	2.42497	-7.58366	2.8281e-13	8.76982e-12	19.4946
LGALS2	-1.1372	2.56364	-7.55814	3.35132e-13	1.03428e-11	19.3286
SLC7A7	-0.817928	2.23368	-7.55208	3.48904e-13	1.07508e-11	19.2892
APOL3	-0.944448	4.15448	-7.54376	3.68711e-13	1.13431e-11	19.2352
VSIR	-0.699439	3.49244	-7.52048	4.30215e-13	1.3152e-11	19.0843
APOBR	-0.592654	2.1814	-7.52003	4.31494e-13	1.31704e-11	19.0814
OGN	-0.871475	0.972176	-7.49488	5.09547e-13	1.55276e-11	18.9188
S100B	-0.667655	0.969711	-7.49465	5.10318e-13	1.55276e-11	18.9173
COL6A2	-1.0987	5.51912	-7.48757	5.34758e-13	1.62458e-11	18.8715
VEGFC	-0.617427	2.41076	-7.48009	5.61797e-13	1.70141e-11	18.8233
FAM163B	-0.768198	0.78696	-7.47276	5.89601e-13	1.7773e-11	18.7761
NIBAN1	-0.698518	1.6702	-7.46639	6.14866e-13	1.85059e-11	18.7351
AKNA	-0.622153	2.3243	-7.46214	6.32312e-13	1.89723e-11	18.7077
HGF	-0.836226	1.20595	-7.45764	6.51344e-13	1.95132e-11	18.6787
PDCD1	-0.93624	1.27823	-7.45572	6.59624e-13	1.97309e-11	18.6664
PDE2A	-0.587735	1.77827	-7.44957	6.86877e-13	2.0483e-11	18.6268
HLA-DQB2	-1.1095	2.46742	-7.44868	6.90884e-13	2.0571e-11	18.6211
RAMP2	-0.730648	4.58124	-7.44424	7.11332e-13	2.11151e-11	18.5926
CCDC3	-0.901427	2.94856	-7.43624	7.49736e-13	2.22212e-11	18.5412
CLEC3B	-0.928676	3.79437	-7.42119	8.27552e-13	2.4453e-11	18.4446
COL1A2	-1.38034	4.94669	-7.41847	8.4248e-13	2.48564e-11	18.4271
MARCO	-1.1112	1.28729	-7.4067	9.09994e-13	2.6767e-11	18.3518
JAM2	-0.595449	1.57531	-7.40558	9.16742e-13	2.69248e-11	18.3446
ANTXR1	-0.963122	2.1702	-7.3963	9.74144e-13	2.85675e-11	18.2852
EPHA3	-0.793962	1.18407	-7.35495	1.27606e-12	3.71415e-11	18.0213
GYPC	-0.726611	3.43422	-7.35234	1.29801e-12	3.77238e-11	18.0047
RGCC	-0.645473	4.62992	-7.34972	1.32032e-12	3.8315e-11	17.988
OAS2	-0.917864	3.3401	-7.34688	1.34497e-12	3.89721e-11	17.9699
ARHGAP23	-0.611746	1.92596	-7.34319	1.37771e-12	3.98613e-11	17.9464
CCDC88B	-0.612256	1.96251	-7.33461	1.45677e-12	4.20238e-11	17.8919
SNAI1	-0.824638	2.04587	-7.32395	1.56131e-12	4.49061e-11	17.8242
F2R	-0.915752	3.45279	-7.32326	1.56836e-12	4.50422e-11	17.8198
TAGLN	-0.92472	4.93916	-7.31833	1.61941e-12	4.63714e-11	17.7885
LAMA2	-0.860532	1.36737	-7.30255	1.79402e-12	5.12203e-11	17.6884
SDC3	-0.771063	3.91973	-7.29786	1.84934e-12	5.27224e-11	17.6587
MRC1	-1.03729	2.85794	-7.29424	1.89327e-12	5.3896e-11	17.6358
FGD3	-0.645109	1.52129	-7.28499	2.01011e-12	5.69716e-11	17.5773
ADGRL4	-0.602153	3.1635	-7.26914	2.22714e-12	6.29395e-11	17.4771
ID3	-0.772854	4.58549	-7.25299	2.47194e-12	6.97561e-11	17.3752
PLAU	-0.789578	2.78891	-7.25156	2.49497e-12	7.0304e-11	17.3662
SOCS1	-0.889556	2.91677	-7.25044	2.51304e-12	7.07107e-11	17.3591
SLCO2A1	-0.932517	2.37166	-7.24101	2.6706e-12	7.47115e-11	17.2997
SOCS3	-1.09785	4.289	-7.22401	2.97942e-12	8.27556e-11	17.1929
PTPRB	-0.603316	1.86727	-7.22221	3.0142e-12	8.36022e-11	17.1815
NNMT	-1.82815	6.87039	-7.2045	3.37758e-12	9.28857e-11	17.0703
FXYD5	-0.829338	4.34152	-7.19944	3.48905e-12	9.5546e-11	17.0386
COLEC10	-0.895709	1.27267	-7.18914	3.72739e-12	1.01786e-10	16.9741
SLFN11	-0.681968	1.75532	-7.18746	3.76782e-12	1.02746e-10	16.9636
CARD11	-0.688577	1.33083	-7.18542	3.81739e-12	1.03952e-10	16.9508
PTGDS	-2.05462	3.77739	-7.16044	4.47938e-12	1.21638e-10	16.7946
HLA-B	-0.938795	9.90489	-7.15578	4.61498e-12	1.24971e-10	16.7655
FCGR2A	-0.753237	2.46434	-7.14973	4.79661e-12	1.29529e-10	16.7278
CDC42EP5	-0.608414	2.45628	-7.14484	4.94891e-12	1.33456e-10	16.6973
STEAP4	-0.743883	1.53321	-7.08558	7.21606e-12	1.91932e-10	16.3291
EMCN	-0.59302	2.33047	-7.08363	7.30593e-12	1.94056e-10	16.317
PCED1B	-0.748161	2.2121	-7.06141	8.41074e-12	2.22188e-10	16.1796
CD209	-0.647116	1.58829	-7.05545	8.73393e-12	2.301e-10	16.1428
MTHFD2	-0.672379	1.73105	-7.04758	9.17956e-12	2.41187e-10	16.0942
DPYSL3	-0.842372	2.3049	-7.0248	1.06e-11	2.77758e-10	15.9538
FOXA2	0.633114	5.4062	6.99556	1.27427e-11	3.33007e-10	15.7742
LTB	-1.13443	3.42453	-6.99414	1.28568e-11	3.35087e-10	15.7655
CD34	-0.592682	3.56767	-6.98928	1.32558e-11	3.44562e-10	15.7357
COL3A1	-1.42999	5.75903	-6.98865	1.33081e-11	3.4546e-10	15.7318
COL15A1	-0.87563	2.94755	-6.96833	1.51186e-11	3.89339e-10	15.6074
LGALS9	-0.815293	3.45559	-6.93182	1.89982e-11	4.86029e-10	15.3846
TRPV2	-0.70541	2.7143	-6.91985	2.04726e-11	5.20324e-10	15.3117
PLTP	-1.08833	4.29747	-6.86369	2.90305e-11	7.31139e-10	14.9711
COL1A1	-1.46714	5.67655	-6.86192	2.93497e-11	7.38223e-10	14.9604
DOK1	-0.585373	2.00572	-6.85218	3.11757e-11	7.82127e-10	14.9016
PLAC8	-0.647149	0.861893	-6.8456	3.24732e-11	8.12583e-10	14.8618
COL6A1	-0.956269	5.5796	-6.84467	3.26598e-11	8.16201e-10	14.8562
PDGFRA	-0.926907	1.42019	-6.84444	3.27075e-11	8.16343e-10	14.8548
ISG20	-0.642016	2.5967	-6.82721	3.63833e-11	9.02296e-10	14.751
ITGBL1	-0.74972	1.08848	-6.81849	3.83942e-11	9.50955e-10	14.6986
BGN	-1.22058	7.07568	-6.80702	4.12095e-11	1.0168e-09	14.6296
LTBP2	-0.949544	2.68335	-6.80302	4.22369e-11	1.04083e-09	14.6056
EHD3	-0.599484	1.82135	-6.80179	4.25593e-11	1.04744e-09	14.5982
GAS7	-0.612658	1.20664	-6.79871	4.33732e-11	1.06613e-09	14.5797
TUBA1A	-0.753544	4.05239	-6.79113	4.54442e-11	1.11421e-09	14.5342
CRHBP	-0.881066	1.21135	-6.78307	4.77551e-11	1.16793e-09	14.4859
ETV7	-0.795281	1.9744	-6.7659	5.30636e-11	1.29126e-09	14.3832
CXCL11	-0.892599	1.74709	-6.75299	5.74365e-11	1.39592e-09	14.306
FSTL1	-0.874396	3.7386	-6.74717	5.95197e-11	1.43936e-09	14.2713
GAL3ST4	-0.658377	1.31874	-6.74158	6.15908e-11	1.4839e-09	14.238
PDE4B	-0.622005	1.49386	-6.73625	6.3632e-11	1.53118e-09	14.2062
NLRC5	-0.595934	2.24581	-6.73388	6.45636e-11	1.55168e-09	14.192
CETP	-0.702694	2.45435	-6.72009	7.02389e-11	1.67771e-09	14.11
GAS6	-0.794895	4.33983	-6.67942	8.99791e-11	2.1283e-09	13.8687
CXCL14	-1.06216	1.21655	-6.66489	9.82844e-11	2.31131e-09	13.7827
HK1	-0.72336	2.87444	-6.66131	1.00438e-10	2.35848e-09	13.7616
ELK3	-0.612088	3.39519	-6.65901	1.01849e-10	2.38745e-09	13.748
CCL24	-0.739477	1.43191	-6.65508	1.04308e-10	2.4405e-09	13.7248
DPEP1	-0.76728	0.875829	-6.65093	1.06959e-10	2.49653e-09	13.7003
IRF1	-0.612521	4.02822	-6.63931	1.1476e-10	2.669e-09	13.6318
DNASE1L3	-0.942291	3.03756	-6.63735	1.1613e-10	2.69763e-09	13.6202
IGFBP6	-0.765861	2.51461	-6.62079	1.28351e-10	2.97086e-09	13.5228
PLA2G2A	-2.5111	5.4634	-6.61523	1.32732e-10	3.06498e-09	13.4901
MYH11	-0.788802	1.74447	-6.6067	1.39741e-10	3.22299e-09	13.44
ARL4C	-0.877896	3.42324	-6.60059	1.44983e-10	3.33993e-09	13.4042
PSMB10	-0.593456	4.77324	-6.59786	1.47381e-10	3.39116e-09	13.3882
COL8A1	-0.652974	1.29697	-6.59083	1.53755e-10	3.52947e-09	13.347
NEXN	-0.601538	1.39081	-6.58199	1.62151e-10	3.71342e-09	13.2952
IL33	-0.801567	2.42634	-6.57185	1.72329e-10	3.93263e-09	13.236
IDO1	-0.761761	1.41218	-6.56928	1.75013e-10	3.98919e-09	13.2209
FOS	-1.12086	4.76288	-6.55325	1.92669e-10	4.37625e-09	13.1274
MMP19	-0.603947	1.73015	-6.55235	1.93711e-10	4.38966e-09	13.1221
LIMD2	-0.804566	2.76254	-6.5518	1.94355e-10	4.39911e-09	13.1189
TIE1	-0.586006	3.10521	-6.54963	1.96898e-10	4.45149e-09	13.1062
PSMB9	-0.77052	4.87003	-6.54866	1.98049e-10	4.47231e-09	13.1006
ERBB3	0.627058	5.87592	6.52737	2.24948e-10	5.02719e-09	12.9766
KCNE4	-0.726479	1.49259	-6.51318	2.44831e-10	5.46526e-09	12.8942
STMN2	-0.957162	1.10151	-6.50883	2.51255e-10	5.60225e-09	12.869
APOBEC3D	-0.596651	1.38362	-6.50766	2.53018e-10	5.63509e-09	12.8622
VWF	-0.781954	3.97693	-6.50568	2.56016e-10	5.68508e-09	12.8507
ABR	-0.654905	1.85706	-6.5056	2.5614e-10	5.68508e-09	12.8503
GBP1	-0.767005	4.31613	-6.50446	2.57887e-10	5.71734e-09	12.8436
BCL2A1	-0.806137	1.80949	-6.49724	2.69222e-10	5.95504e-09	12.8018
CAVIN1	-0.652032	5.52331	-6.49576	2.71606e-10	6.00094e-09	12.7932
FMOD	-1.10321	2.70374	-6.48401	2.91261e-10	6.42063e-09	12.7252
GPRIN3	-0.592648	1.23482	-6.47323	3.1053e-10	6.82218e-09	12.6629
COL5A1	-1.07923	3.0137	-6.44987	3.56645e-10	7.75643e-09	12.5282
PLAT	-0.733595	2.18727	-6.44541	3.66192e-10	7.95516e-09	12.5025
MXRA5	-0.709885	1.24143	-6.43971	3.78763e-10	8.2099e-09	12.4697
JUNB	-0.755221	6.7111	-6.41939	4.27057e-10	9.22586e-09	12.353
SH3BGRL	-0.750191	4.73584	-6.40915	4.53621e-10	9.77799e-09	12.2943
PAMR1	-0.606441	1.34793	-6.39832	4.83498e-10	1.0399e-08	12.2323
SOD3	-1.15397	3.27393	-6.39404	4.95826e-10	1.06523e-08	12.2078
LHFPL6	-0.752352	3.60269	-6.39359	4.97139e-10	1.06687e-08	12.2053
THY1	-0.730018	4.21359	-6.38167	5.33244e-10	1.13933e-08	12.1371
SLC2A3	-0.718459	2.30054	-6.38138	5.34144e-10	1.14e-08	12.1354
TMEM273	-0.639728	1.90241	-6.37744	5.46656e-10	1.16414e-08	12.1129
CALCRL	-0.716406	2.71331	-6.36433	5.90335e-10	1.25441e-08	12.0382
ASPN	-0.998183	3.3906	-6.33862	6.86219e-10	1.45181e-08	11.8919
APOL4	-0.599252	1.44338	-6.33837	6.87192e-10	1.45229e-08	11.8905
SLC7A8	-0.612994	1.58403	-6.33709	6.92361e-10	1.46163e-08	11.8832
RASA3	-0.708306	2.27257	-6.33156	7.15098e-10	1.50799e-08	11.8518
CXCL10	-1.22664	4.90462	-6.31622	7.82036e-10	1.6438e-08	11.7649
CDH5	-0.616408	3.68797	-6.31156	8.03541e-10	1.68354e-08	11.7385
EFEMP2	-0.671062	2.52813	-6.3106	8.08047e-10	1.68934e-08	11.7331
HLA-F	-0.813421	5.46305	-6.30417	8.389e-10	1.75196e-08	11.6967
CHST7	-0.659383	2.56781	-6.29395	8.90276e-10	1.85527e-08	11.6389
COL8A2	-0.61586	0.92178	-6.29144	9.0331e-10	1.88041e-08	11.6248
PPP1R18	-0.702553	4.2576	-6.28835	9.19686e-10	1.91041e-08	11.6073
RNASE1	-0.751378	6.09051	-6.27979	9.66548e-10	2.00347e-08	11.5591
C1R	-0.691736	8.54697	-6.27033	1.02106e-09	2.11197e-08	11.5057
C1QTNF1	-1.00054	3.02885	-6.26789	1.03559e-09	2.1352e-08	11.492
SPARC	-0.745411	7.49202	-6.26219	1.07036e-09	2.1999e-08	11.4599
IFI44L	-0.703318	1.32692	-6.25667	1.10512e-09	2.26654e-08	11.4289
ADGRE5	-0.800944	3.73881	-6.24814	1.16101e-09	2.37867e-08	11.381
ECM1	-0.749747	2.4212	-6.24155	1.20607e-09	2.46837e-08	11.344
SMYD2	0.627691	4.73981	6.23574	1.2472e-09	2.5472e-08	11.3114
PLAC9	-0.700884	2.51364	-6.23294	1.26751e-09	2.58595e-08	11.2957
GFPT2	-0.608287	0.87948	-6.22707	1.31118e-09	2.66387e-08	11.2628
F2RL3	-0.682817	1.61699	-6.22619	1.31786e-09	2.67464e-08	11.2579
METRNL	-0.836758	3.18402	-6.21556	1.40101e-09	2.83453e-08	11.1985
HLA-DQA2	-1.17756	3.30104	-6.20332	1.50327e-09	3.02569e-08	11.1301
SERPINB9	-0.638885	2.71761	-6.19893	1.54164e-09	3.0965e-08	11.1056
FAM49A	-0.586289	1.95178	-6.1954	1.57324e-09	3.15671e-08	11.0859
GCH1	-0.727803	4.60558	-6.18859	1.636e-09	3.26915e-08	11.0479
MYL9	-0.823517	5.37299	-6.17999	1.71872e-09	3.4309e-08	11
RNF43	0.843942	2.99586	6.16953	1.8248e-09	3.62776e-08	10.9419
GLIPR1	-0.677756	1.84012	-6.16878	1.83267e-09	3.6397e-08	10.9377
CFD	-0.768299	3.10803	-6.16413	1.88209e-09	3.73403e-08	10.9119
FOXRED2	0.621421	3.9932	6.16114	1.91454e-09	3.79453e-08	10.8953
SKAP1	-0.775006	2.54583	-6.15282	2.00781e-09	3.96726e-08	10.8491
FRZB	-0.718065	2.51534	-6.14694	2.07638e-09	4.09027e-08	10.8165
ADRA2A	-0.729284	1.07602	-6.1428	2.12598e-09	4.17951e-08	10.7936
TLR2	-0.723542	1.88943	-6.11971	2.42493e-09	4.73848e-08	10.6659
FNDC1	-0.744706	1.06985	-6.10934	2.57214e-09	5.01605e-08	10.6087
TIMP2	-0.917579	4.87411	-6.10157	2.68822e-09	5.21627e-08	10.5659
GJA5	-0.691309	2.49462	-6.09785	2.74553e-09	5.31686e-08	10.5454
TOX	-0.687082	1.01291	-6.08463	2.9593e-09	5.71945e-08	10.4727
FHL2	-0.651998	2.07718	-6.05717	3.45639e-09	6.64714e-08	10.322
RAB20	-0.621326	5.23095	-6.05591	3.48095e-09	6.68115e-08	10.3152
MXRA8	-0.836407	2.87183	-6.05488	3.50125e-09	6.71349e-08	10.3095
VCAM1	-1.02749	3.22878	-6.04757	3.64874e-09	6.9894e-08	10.2695
IL34	-0.716488	2.21559	-6.03444	3.92864e-09	7.49603e-08	10.1978
ELN	-1.02842	2.71883	-6.0331	3.95856e-09	7.53833e-08	10.1905
SFRP4	-0.828047	1.59653	-6.02797	4.07433e-09	7.73606e-08	10.1625
PPP1R14A	-0.608648	2.86028	-6.01606	4.35634e-09	8.25538e-08	10.0976
GPX8	-0.630581	1.70698	-6.00898	4.53308e-09	8.56528e-08	10.0591
MICAL1	-0.6192	2.42874	-5.99614	4.87118e-09	9.19517e-08	9.98932
CYBRD1	-0.799917	3.12666	-5.98975	5.04864e-09	9.50249e-08	9.95463
VCAN	-0.978738	1.92306	-5.98775	5.10559e-09	9.60038e-08	9.94375
HEG1	-0.618316	2.8964	-5.97269	5.55391e-09	1.03732e-07	9.86216
CLEC11A	-0.779884	2.94778	-5.96946	5.65497e-09	1.05316e-07	9.84468
ITGAL	-0.63103	3.43829	-5.96682	5.73887e-09	1.06572e-07	9.83041
LTBP4	-0.819154	3.16764	-5.96268	5.87304e-09	1.08959e-07	9.80801
CXCL13	-1.17853	1.65737	-5.96154	5.91038e-09	1.09548e-07	9.80186
CDH11	-0.593959	1.02529	-5.95629	6.08599e-09	1.12481e-07	9.77349
FGFR4	0.713261	6.45581	5.94283	6.55931e-09	1.20999e-07	9.7009
DLL1	-0.639863	1.98072	-5.92089	7.40935e-09	1.35014e-07	9.58282
LFNG	-0.593595	2.16841	-5.91932	7.47439e-09	1.35944e-07	9.57435
IQGAP1	-0.650972	3.02023	-5.91593	7.61597e-09	1.38261e-07	9.55617
MYOF	-0.70526	2.08166	-5.891	8.74258e-09	1.57976e-07	9.42252
PODXL	-0.672841	3.70503	-5.88978	8.80201e-09	1.58902e-07	9.41596
FIBIN	-0.776492	1.48688	-5.88595	8.99019e-09	1.61998e-07	9.39547
CREB3L1	-0.843232	1.54593	-5.86438	1.01251e-08	1.80441e-07	9.28033
FILIP1L	-0.612605	2.41668	-5.8512	1.08863e-08	1.93299e-07	9.21013
IFI44	-0.796126	3.93201	-5.79446	1.48522e-08	2.60623e-07	8.90939
CPXM1	-0.692826	1.69556	-5.76329	1.75988e-08	3.06058e-07	8.74518
COL6A3	-0.827858	2.90801	-5.74524	1.94086e-08	3.36045e-07	8.65047
TNFRSF18	-0.628815	1.64543	-5.74504	1.943e-08	3.36101e-07	8.6494
BATF	-0.908341	2.82973	-5.74221	1.97302e-08	3.40688e-07	8.63457
GUCY1A1	-0.626201	1.63674	-5.73374	2.06557e-08	3.55407e-07	8.59022
PLAUR	-0.650349	1.90837	-5.71446	2.29232e-08	3.90961e-07	8.48948
HSH2D	-0.68288	1.60113	-5.69933	2.48702e-08	4.20845e-07	8.41064
CTSK	-0.761699	3.33513	-5.65625	3.13418e-08	5.23521e-07	8.18702
MARVELD1	-0.697352	2.45905	-5.65145	3.21564e-08	5.36206e-07	8.16222
ANXA9	0.627928	5.74241	5.64673	3.29798e-08	5.48995e-07	8.13778
TGFB3	-0.638458	2.3637	-5.5777	4.7612e-08	7.74661e-07	7.78298
SPON1	-0.598551	1.04697	-5.5745	4.84251e-08	7.85262e-07	7.76662
ID4	-0.672591	1.76163	-5.56373	5.1263e-08	8.27143e-07	7.71161
CXCL2	-0.977558	5.04445	-5.55162	5.46461e-08	8.74152e-07	7.64989
SGK1	-0.715807	3.61451	-5.54767	5.57973e-08	8.90695e-07	7.62976
CCN1	-0.753801	5.15314	-5.52354	6.33516e-08	1.00633e-06	7.50716
F3	-0.637164	1.50099	-5.5204	6.44024e-08	1.02218e-06	7.49128
ACTA2	-0.647846	6.03203	-5.50922	6.82955e-08	1.07694e-06	7.43462
TNC	-0.758297	2.09497	-5.50199	7.09326e-08	1.11671e-06	7.39805
FOSB	-0.912742	2.21476	-5.50134	7.11733e-08	1.1196e-06	7.39478
DUSP5	-0.744884	3.68219	-5.4911	7.50899e-08	1.1755e-06	7.34308
IL32	-0.768091	7.79073	-5.47929	7.98712e-08	1.24534e-06	7.28351
ADGRA2	-0.673402	2.1226	-5.47842	8.02332e-08	1.24998e-06	7.27914
MCUB	-0.590671	1.69046	-5.47323	8.24354e-08	1.28223e-06	7.25302
PARM1	-0.625855	1.75517	-5.46299	8.69531e-08	1.34497e-06	7.20154
EDNRB	-0.602672	3.21919	-5.43541	1.00353e-07	1.53273e-06	7.06327
APOL1	-0.591705	6.948	-5.43187	1.02217e-07	1.55875e-06	7.04552
IGFBP5	-0.893357	4.28502	-5.42273	1.07172e-07	1.62666e-06	6.99986
TENT5C	-0.606199	2.17455	-5.41268	1.12892e-07	1.70947e-06	6.94972
FSTL3	-0.931498	3.82549	-5.3969	1.22475e-07	1.84452e-06	6.87116
CCN2	-0.808397	5.78689	-5.39427	1.24147e-07	1.86681e-06	6.85809
GREB1	0.668495	1.54772	5.38922	1.2742e-07	1.91455e-06	6.833
IL4I1	-0.72708	1.79297	-5.38662	1.2914e-07	1.93889e-06	6.82008
COL16A1	-0.666893	1.53858	-5.3757	1.36604e-07	2.0368e-06	6.76591
RGS2	-0.866086	3.69728	-5.3434	1.61217e-07	2.3568e-06	6.60624
MMP9	-1.04468	3.156	-5.29176	2.09763e-07	3.02105e-06	6.35267
MAP3K5	-0.693398	2.60858	-5.28949	2.12192e-07	3.05377e-06	6.34158
POSTN	-1.0054	2.31027	-5.28861	2.13145e-07	3.06522e-06	6.33727
KIRREL1	-0.593592	1.85088	-5.26079	2.4539e-07	3.48511e-06	6.20163
SPC24	0.665445	3.14699	5.25894	2.47703e-07	3.51026e-06	6.1926
NCALD	-0.597758	2.38263	-5.24828	2.61399e-07	3.6936e-06	6.14079
RASL10B	1.00202	1.892	5.23428	2.80505e-07	3.93496e-06	6.07289
HCN3	0.607943	4.35666	5.22962	2.87153e-07	4.02242e-06	6.05035
FAM83D	0.67276	3.47112	5.22019	3.01092e-07	4.20254e-06	6.00474
COX7A1	-0.589733	2.87107	-5.20974	3.17304e-07	4.41298e-06	5.95427
CLEC4G	-0.650059	0.797769	-5.18445	3.60121e-07	4.94829e-06	5.83251
COL4A2	-0.677033	5.79938	-5.1752	3.77136e-07	5.16384e-06	5.78811
ANKRD22	-0.772758	1.23833	-5.1565	4.13954e-07	5.64017e-06	5.69853
BIRC3	-0.847869	3.71269	-5.15229	4.22719e-07	5.74348e-06	5.67839
CAP2	0.65555	4.14322	5.14992	4.27737e-07	5.80355e-06	5.66704
P3H3	-0.589783	1.52011	-5.14118	4.46697e-07	6.03134e-06	5.62534
EGR1	-0.849398	5.62438	-5.13673	4.56674e-07	6.14897e-06	5.60411
TYMP	-0.649598	5.95055	-5.13198	4.67547e-07	6.28232e-06	5.58149
TAP1	-0.588572	5.03079	-5.12646	4.805e-07	6.44301e-06	5.55522
SOD2	-0.611356	6.38202	-5.12183	4.91651e-07	6.57439e-06	5.53317
LAMC3	-0.700761	2.23608	-5.11171	5.16875e-07	6.89273e-06	5.48509
RAC3	0.627806	4.41681	5.10461	5.35304e-07	7.12383e-06	5.45142
CPVL	-0.762552	3.68769	-5.09602	5.58453e-07	7.37636e-06	5.41075
FASN	0.702734	7.21717	5.07511	6.18943e-07	8.08745e-06	5.31195
STAT1	-0.61847	6.1211	-5.06544	6.49039e-07	8.44098e-06	5.26634
PDZK1	0.609836	5.83959	5.05184	6.93756e-07	8.97451e-06	5.20236
MT2A	-1.00247	8.40985	-5.0154	8.2871e-07	1.05656e-05	5.03172
HEYL	-0.713334	2.82201	-5.01285	8.39037e-07	1.06833e-05	5.01983
GRB7	0.634026	3.14716	5.01013	8.50209e-07	1.07907e-05	5.00713
ADAMTSL2	-0.855221	2.95223	-5.00758	8.60809e-07	1.09176e-05	4.99524
ID1	-0.727569	5.01083	-4.9968	9.07064e-07	1.14818e-05	4.94501
TK1	0.66562	5.21918	4.95494	1.1105e-06	1.37001e-05	4.7509
MT1M	-1.18668	2.7343	-4.95257	1.12322e-06	1.38396e-05	4.73997
FOXS1	-0.596887	2.10378	-4.94686	1.1545e-06	1.42069e-05	4.71364
ALOX5	-0.706212	1.92709	-4.94227	1.18031e-06	1.44696e-05	4.69244
OLFML2B	-0.607085	2.64337	-4.93406	1.22774e-06	1.50038e-05	4.65466
PLA2G7	-0.662603	2.72147	-4.88913	1.52215e-06	1.80678e-05	4.44864
SP5	0.838762	2.7272	4.86195	1.73214e-06	2.03985e-05	4.32484
A2M	-0.850415	9.2467	-4.85677	1.77519e-06	2.08802e-05	4.30133
SAA2	-1.58469	5.25631	-4.85313	1.80608e-06	2.12051e-05	4.2848
TSC22D3	-0.70473	5.09019	-4.8353	1.96501e-06	2.28914e-05	4.20405
PHYHIPL	0.740952	2.14221	4.80762	2.23871e-06	2.5695e-05	4.07922
FSCN1	-0.591769	4.16849	-4.80301	2.28777e-06	2.61962e-05	4.05848
FLNA	-0.721446	5.10144	-4.80138	2.3054e-06	2.63657e-05	4.05113
CLDN5	-0.599822	3.53984	-4.78494	2.49019e-06	2.81657e-05	3.97736
CYBA	-0.838925	4.66116	-4.78328	2.50954e-06	2.83515e-05	3.96995
PLPPR1	0.702413	3.10852	4.77212	2.64409e-06	2.97334e-05	3.91999
STMN3	-0.664843	2.19623	-4.7699	2.6716e-06	3.00254e-05	3.91009
LY6E	-0.99271	5.80439	-4.76319	2.75666e-06	3.0892e-05	3.88012
COL4A1	-0.628699	5.73964	-4.75567	2.85498e-06	3.18653e-05	3.8466
HSPB6	-0.838474	3.28262	-4.75279	2.89356e-06	3.22589e-05	3.83377
HPGD	-1.20625	3.69453	-4.7452	2.99762e-06	3.32854e-05	3.79998
CD44	-0.742517	3.15952	-4.71994	3.37062e-06	3.70882e-05	3.68787
TGM2	-0.61007	6.20809	-4.70767	3.56739e-06	3.90536e-05	3.63365
CFHR3	-1.08889	4.74048	-4.7012	3.67565e-06	4.00817e-05	3.60508
SAA2-SAA4	-1.35584	4.03213	-4.65412	4.56415e-06	4.84657e-05	3.3983
OLFML3	-0.699837	2.79372	-4.64246	4.814e-06	5.07309e-05	3.34742
AQP1	-0.752401	5.03712	-4.63743	4.92595e-06	5.17704e-05	3.32547
ACP5	-0.757558	4.61455	-4.63119	5.0683e-06	5.30804e-05	3.29828
TCIM	-0.69426	5.03707	-4.62589	5.19232e-06	5.4131e-05	3.27521
SAA1	-1.65049	8.43109	-4.62451	5.225e-06	5.44425e-05	3.26922
CD7	-0.687213	2.43378	-4.61681	5.41142e-06	5.62042e-05	3.23577
HBB	-0.73273	4.12274	-4.6152	5.45119e-06	5.65568e-05	3.22878
PLEKHA4	-0.593948	3.47268	-4.61018	5.57705e-06	5.7678e-05	3.20701
PRKAA2	0.590292	1.83448	4.60948	5.59477e-06	5.7769e-05	3.20398
FGG	-0.83121	11.3295	-4.60118	5.80957e-06	5.97648e-05	3.16804
TGFB1	-0.682208	4.32514	-4.57747	6.46788e-06	6.54974e-05	3.06566
SULF2	-0.733839	3.75003	-4.57174	6.63749e-06	6.69708e-05	3.04098
KNDC1	-0.674299	1.28916	-4.56696	6.78208e-06	6.82526e-05	3.02043
LARGE2	0.730664	2.10376	4.56276	6.91171e-06	6.95211e-05	3.00238
LY96	-0.772307	4.21279	-4.5418	7.59518e-06	7.59244e-05	2.9125
SDS	-1.49248	6.18274	-4.47139	1.03975e-05	9.99797e-05	2.6134
S100A6	-0.827309	6.77877	-4.4591	1.09789e-05	0.000104793	2.56162
C9	-1.52011	5.4336	-4.44028	1.19302e-05	0.000112602	2.48256
RARRES1	-0.694465	2.66734	-4.41395	1.33944e-05	0.000125265	2.37247
CDT1	0.607281	2.98671	4.41154	1.35367e-05	0.000126293	2.36242
IFI27	-1.07351	5.78075	-4.40469	1.39493e-05	0.000129583	2.33387
BST2	-0.732343	8.05039	-4.38358	1.52974e-05	0.000140961	2.24619
CHRDL2	-0.590558	2.30315	-4.3767	1.57628e-05	0.000144701	2.21772
TMEM45A	-0.802095	3.00015	-4.37444	1.59191e-05	0.00014586	2.20834
HTRA3	-0.709422	2.09866	-4.36125	1.68586e-05	0.000153528	2.15387
AKR1B1	-0.637655	3.53558	-4.31688	2.04252e-05	0.000181835	1.97166
KIFC1	0.640537	3.23622	4.3088	2.11481e-05	0.000187242	1.93866
LBP	-0.81903	9.03911	-4.26855	2.51282e-05	0.000218893	1.7751
RASD1	-0.799436	5.07038	-4.26338	2.5688e-05	0.000222659	1.75421
NCF2	-0.588199	2.90746	-4.24984	2.7213e-05	0.000233393	1.69955
KMO	-0.604901	2.67026	-4.2448	2.78014e-05	0.00023781	1.67927
FGA	-0.745324	12.0786	-4.21036	3.21669e-05	0.000269927	1.54111
HSPG2	-0.643862	3.26175	-4.19871	3.37853e-05	0.000280601	1.49463
BIRC5	0.656853	3.552	4.16968	3.81655e-05	0.000311133	1.37925
SQLE	0.62241	5.3947	4.16871	3.83205e-05	0.000312004	1.37542
OSMR	-0.603024	2.9441	-4.15824	4.00357e-05	0.0003238	1.33399
CENPM	0.596471	2.97907	4.14861	4.16773e-05	0.000335263	1.29599
FGB	-0.832172	11.8365	-4.10278	5.04089e-05	0.000397284	1.11619
TDO2	-0.992144	5.313	-4.10252	5.0462e-05	0.000397541	1.1152
ASPG	-0.812424	2.51393	-4.09606	5.1828e-05	0.00040682	1.08997
PMEPA1	-0.678557	2.45906	-4.09473	5.21115e-05	0.000408225	1.08481
SULF1	-0.62759	1.871	-4.04024	6.51661e-05	0.000494545	0.873781
MT1E	-1.12067	5.82157	-4.03392	6.68666e-05	0.000505518	0.849482
E2F1	0.622504	3.92706	4.02971	6.80229e-05	0.000512425	0.833311
CRP	-1.57819	8.37252	-3.99615	7.79458e-05	0.000578656	0.704934
TC2N	-0.591444	1.83977	-3.98112	8.28228e-05	0.000608358	0.647751
MSC	-0.856586	2.62173	-3.97898	8.35404e-05	0.000612889	0.639625
SEL1L3	-0.68852	2.91968	-3.97584	8.4603e-05	0.000619095	0.627719
OR2I1P	-0.895013	6.32236	-3.95663	9.13958e-05	0.000660844	0.554991
THBS1	-0.66244	4.1546	-3.91382	0.000108432	0.000761372	0.394159
TREM2	-0.607714	3.13318	-3.89195	0.000118255	0.000818815	0.312622
VSNL1	0.606013	3.11785	3.87557	0.000126164	0.000866174	0.251787
RHBG	1.05026	2.75566	3.83976	0.000145218	0.000974622	0.119698
FGL1	-0.8162	9.02576	-3.83242	0.000149447	0.000997496	0.0927552
KIF12	0.630524	3.87424	3.78565	0.000179248	0.00116598	-0.0777731
MT1F	-0.833263	3.09989	-3.76832	0.000191652	0.00123479	-0.14047
LGR5	0.705421	1.47249	3.76168	0.000196621	0.00126252	-0.164446
GPAM	0.601167	5.14462	3.7441	0.000210351	0.00133874	-0.227649
MFSD2A	-0.885978	3.08421	-3.74285	0.000211364	0.00134431	-0.232149
CFHR4	-0.786493	3.9991	-3.74144	0.000212512	0.00134859	-0.237219
CAPG	-0.63591	4.36533	-3.73587	0.000217087	0.00137397	-0.257156
HGFAC	-1.08717	4.16286	-3.70299	0.000246083	0.00152862	-0.374436
LGALS3	-0.638225	5.2321	-3.69809	0.000250707	0.00155091	-0.391842
VWCE	0.612497	2.77184	3.66383	0.000285377	0.00172746	-0.512873
PCOLCE2	0.643011	3.44924	3.6608	0.000288657	0.00174513	-0.523544
FCN2	-0.599796	1.40723	-3.65554	0.000294426	0.00177184	-0.542024
ARSE	0.624888	5.96914	3.62851	0.000325809	0.0019319	-0.636552
CTHRC1	-0.667157	2.56883	-3.60469	0.000356058	0.0020808	-0.719347
LGALS3BP	-0.696994	7.44752	-3.59529	0.000368698	0.00213988	-0.751864
PKLR	0.709149	6.3523	3.58282	0.000386128	0.00222378	-0.794903
MYBL2	0.686223	3.58385	3.55875	0.000421972	0.00239545	-0.877566
AGXT2	-0.594971	3.97484	-3.54689	0.00044075	0.00247817	-0.918086
TOP2A	0.597487	3.64819	3.54664	0.00044116	0.00247975	-0.918951
SLC22A1	-1.08369	5.65399	-3.52735	0.000473421	0.00263067	-0.984601
NKD1	0.727363	1.6182	3.51088	0.000502708	0.00276657	-1.0404
PEG10	1.13527	3.23101	3.50357	0.000516255	0.00283146	-1.06511
HPX	-0.689777	9.86636	-3.50191	0.000519372	0.00284455	-1.0707
C1QTNF3	0.646444	2.17945	3.48803	0.000546162	0.00296455	-1.11742
HLF	0.596	4.37045	3.48419	0.000553797	0.00299846	-1.13031
TUBB4A	0.699825	1.72944	3.46305	0.000597674	0.00319159	-1.20108
ALPL	-0.614345	4.35472	-3.44204	0.00064447	0.00339823	-1.271
TBX3	0.601747	3.77482	3.42031	0.000696463	0.00362108	-1.34291
TMEM92	-0.628058	2.26522	-3.38223	0.000797113	0.00404972	-1.46787
C6	-0.677104	6.16991	-3.37504	0.000817558	0.0041277	-1.4913
SCD	0.653634	8.86708	3.36592	0.000844216	0.0042419	-1.52097
UPP2	-0.635047	1.6821	-3.36488	0.000847307	0.0042525	-1.52435
FBP1	-0.600572	7.70891	-3.2927	0.00108951	0.00524602	-1.75648
HAO2	-0.885611	4.25252	-3.28214	0.0011299	0.00541633	-1.79003
SLC22A10	-0.585113	3.11959	-3.27011	0.00117762	0.00560363	-1.82814
ALDOB	-0.831618	10.6876	-3.26257	0.00120848	0.00572387	-1.85197
HP	-0.794208	10.6206	-3.24893	0.00126622	0.00594522	-1.89494
VIL1	0.706546	3.49332	3.23548	0.00132562	0.006185	-1.93712
MT1G	-1.08551	5.43476	-3.21481	0.00142202	0.00655693	-2.00165
MT1X	-0.76977	5.99049	-3.18833	0.00155494	0.00706043	-2.08373
F2RL1	-0.59006	3.0891	-3.17492	0.00162656	0.00732572	-2.12506
SLC39A5	0.746349	5.42243	3.15466	0.00174053	0.00775108	-2.18717
VNN1	-0.805426	5.32025	-3.13975	0.00182909	0.00806785	-2.23264
MT1H	-0.806734	2.37871	-3.10286	0.00206643	0.0088869	-2.34431
QSOX1	-0.599275	3.69795	-3.02461	0.00266627	0.0109599	-2.57695
GAL3ST1	0.642393	2.6636	2.99505	0.00293179	0.011883	-2.66338
PGLYRP2	-0.681179	5.64856	-2.94053	0.00348594	0.0137034	-2.82067
GLUL	0.617533	8.20743	2.90633	0.00388067	0.0149232	-2.9179
AKR1D1	-0.688998	4.31761	-2.86011	0.00447909	0.0167271	-3.04761
SLPI	-0.890318	7.38107	-2.84381	0.00470942	0.0173781	-3.09288
SFN	0.726792	4.44046	2.80291	0.00533545	0.0192177	-3.20538
PAGE4	0.737133	1.5399	2.79756	0.00542273	0.0194744	-3.21999
HAL	-0.708469	4.63699	-2.75501	0.0061639	0.0215884	-3.33514
NOTUM	0.799897	3.50086	2.62314	0.00907875	0.0295516	-3.68132
MAGEC2	0.590774	1.47198	2.57687	0.0103631	0.0327626	-3.7989
MYH4	-0.674547	1.6103	-2.56767	0.010637	0.0334652	-3.82203
APOA4	-0.95962	3.95158	-2.55553	0.0110083	0.034395	-3.85244
CYP1A1	0.693747	2.53953	2.51274	0.0124114	0.0377823	-3.95854
PCK1	-0.677743	6.53644	-2.50634	0.0126341	0.0383379	-3.97424
MMP7	-0.586949	2.1049	-2.45255	0.0146533	0.0432394	-4.10482
ADH1C	-0.739556	7.65549	-2.43588	0.0153347	0.044777	-4.14474
CPLX2	0.631921	1.90743	2.42217	0.0159159	0.0461182	-4.17737
SERPINA7	-0.618767	6.5249	-2.40219	0.0167977	0.0482347	-4.2246
